20 <sup>10</sup> Snyder Institute for Chronic Diseases, University of Calgary and Alberta Health Services,  
21 Calgary, Canada

22 <sup>11</sup> Advancing Canadian Water Assets, University of Calgary, Calgary, Canada

23

24

25 **Keywords:** antibiotic resistance, antimicrobial agents, metagenomic, wastewater

26 **Abstract word count:** 235

27 **Manuscript word count:** 4854

28 **Figures:** 5

29 **Supplemental Tables:** 4

30 **Supplemental Figures:** 2

31

32

33 **\*Corresponding author:**

34 Michael D. Parkins

35 Professor, Departments of Medicine and Microbiology, Immunology & Infectious Diseases,

36 Cumming School of Medicine, University of Calgary.

37 Section Chief, Division of Infectious Diseases, Alberta Health Services, Calgary Zone

38 Postal address: 3330 Hospital Drive, NW, Calgary, Alberta, T2N 4N1 CANADA.

39 e-mail: [mdparkin@ucalgary.ca](mailto:mdparkin@ucalgary.ca)

40 Phone: 403-220-5951, Fax: 403-270-2772.

41

42

43

44

45 **Abstract**

46 Antimicrobial resistance (AMR) is an ever-increasing threat to global health. Wastewater-based  
47 surveillance is an emerging methodology that objectively enables an inclusive and  
48 comprehensive assessment of population AMR in an observed sewershed. Here we compared the  
49 resistome of two tertiary-care hospitals with two separate neighborhoods, using complimentary  
50 targeted qPCR and metagenomics of wastewater before and after selective culture enrichment for  
51 clinically important Gram negatives. In total 26 ARG-type (1225 ARG-subtypes) were found  
52 across all samples, in which  $\beta$ -lactam ARG was the richest (the number of different ARG-  
53 subtypes found) followed by multidrug, fluoroquinolone, macrolide-lincosamide-streptogramin  
54 (MLS) and aminoglycoside. The composition of ARGs in wastewater differed between raw  
55 wastewater pellets and culture-enriched wastewater samples and the resistomes clustered based  
56 on the type of location (Hospitals vs neighborhoods). Hospital wastewater was found to have  
57 higher diversity and greater abundance of ARGs compared to neighborhood wastewater when  
58 the composition profiles of ARGs in both raw and culture-enriched wastewater pellets.  
59 Clinically relevant ARG (i.e., VIM, NDM metallo- $\beta$ -lactamases) were detected in culture  
60 enrichment samples that were not identified in raw samples, despite a lower targeted sequencing  
61 depth. Wastewater-based surveillance is an effective, and potentially extremely important and  
62 powerful tool that could be developed to augment hospital-based infection control and  
63 antimicrobial stewardship programs, creating a safer space for those receiving care.

64

## 65 INTRODUCTION

66 The emergence and spread of antimicrobial-resistant organisms (AROs) is a profound global  
67 health threat (Mulvey and Simor 2009; Finaly B et al. 2019). AROs result in disproportionately  
68 higher morbidity and mortality, and incur huge healthcare costs (Cosgrove et al. 2003;  
69 Tumbarello et al. 2015; Morata et al. 2012; Zimlichman et al. 2013; Valiquette, Chakra, and  
70 Laupland 2014; Ghantaji et al. 2010). Globally, ARO-related deaths are expected to rise to  
71 10 million/year by 2050, costing the global economy >\$100 trillion in lost productivity  
72 (Strathdee, Davies, and Marcelin 2020). In particular, emerging threats such as Enterobacterales  
73 and *Pseudomonas aeruginosa*-producing extended-spectrum  $\beta$ -lactamases (ESBLs) (Peirano et  
74 al. 2020; Holland et al. 2020; Peirano et al. 2012; Pitout et al. 2007; Pitout et al. 2004), metallo-  
75 beta-lactamases (MBLs) (Matsumura et al. 2018; Peirano et al. 2018; Parkins et al. 2007; Pitout,  
76 Nordmann, et al. 2005; Pitout, Gregson, et al. 2005; Doyle et al. 2012) and KPC carbapenemases  
77 (Doyle et al. 2012; Stoesser et al. 2017; Chan et al. 2013) are associated with increasing  
78 incidence, and few potential treatment options and thusly recognized as key organisms of  
79 concern by the World Health Organization and US Centers for Disease Control and Prevention.

80 Recently Mitchell and collaborators (2022) performed an exploratory analysis of AMR and  
81 proposed a framework to align AMR research with AMR policy and its connections across the  
82 One Health landscape (i.e., humans–animals–environment). Two of the eight key themes that  
83 were emphasized was the optimizations of AMR surveillance and the understanding of AMR in  
84 the environment (Mitchell, O'Neill, and King 2022). These key aspects require a broad  
85 knowledge of resistance burden within the community and understanding of the drivers behind  
86 AMR outbreaks/hotspots. In the light of this, wastewater-based surveillance (WBS) has been  
87 described as a potential tool that could be adapted for this purpose. Indeed, WBS has proven

88 transformative in understanding the COVID-19 pandemic (Acosta et al. 2021; Acosta et al. 2022;  
89 Acosta et al. 2023; Peccia et al. 2020; Randazzo et al. 2020; Miyani et al. 2021; Zhu et al. 2021;  
90 Xiao et al. 2021; Zhan et al. 2022; Galani et al. 2022; Hegazy et al. 2022; Hubert et al. 2022).  
91 WBS's major advantage is its ability to objectively monitor entire populations passively and  
92 comprehensively, making it accurate, inclusive and cost-effective (Choi 2020; Sims and  
93 Kasprzyk-Hordern 2020).

94 Multiple approaches have been used in initial investigations of AMR in wastewater including  
95 both culture-dependant and independent approaches. These works have increasingly identified  
96 clinically relevant ARGs in wastewater, including Metallo- $\beta$ -lactamases (MBLs) (e.g., New  
97 Delhi Metallo-beta-lactamases (NDM), VIMs, IMPs) and mobile colistin resistance (i.e., Mcr-1)  
98 (Mittal 2019; Lira et al. 2020; Fleres et al. 2019). A limitation of metagenomic assessment of  
99 environmental samples relates to sequencing depth, with progressively greater costs incurred  
100 with higher sequencing depths when assessing for ultra-rare gene targets (Zhang et al. 2015;  
101 Wang et al. 2015). Furthermore, accurate gene identification and classification is dependant on  
102 factors including efficient assembly of short-read fragments into large contigs, inhibitory factors  
103 in the matrix, and contaminating host DNA. Selective culture enrichment is an elegant technique,  
104 uniquely positioned to augment metagenomic assessment of complex samples overcoming some  
105 of these limitations (Whelan et al. 2020; Zhang, Zhang, and Ju 2022; Wang et al. 2021). For  
106 instance, manipulating growth conditions, specific phenotypes of interest (i.e., those mediate via  
107 transmissible beta-lactamases) can be differentially increased potentially improving the detection  
108 limits of agnostic approaches for ultra-rare genes. Furthermore, culture enrichment also  
109 increases the potential to ascribe individual ARG to those organisms carrying them in the natural  
110 environment (Miłobedzka et al. 2022; Marano et al. 2021).

111 Herein, we assessed the resistome of wastewater from multiple tertiary care hospitals and  
112 neighborhoods in Calgary, Canada, by deploying complementary metagenomic analysis of raw  
113 pellet and selectively culture-enriched wastewater samples to identify genes mediating  
114 antimicrobial resistance of critical pathogens. Hospitals represent a unique and under explored  
115 area for wastewater-based surveillance applications. Indeed, infections represent the area where  
116 hospitals are most vulnerable, yet least resourced to respond dynamically, and new tools to  
117 augment infection control, and antimicrobial stewardship are desperately required. The aims of  
118 this work were i). establish if the resistome of hospital wastewater differed from the general  
119 population, ii). determine if specific class of ARG existed disproportionately in hospitals and iii).  
120 determine if selective culture enrichment would increase the potential of conventional  
121 metagenomics approaches in detecting ultra-rare ARG of clinically relevant Gram negatives.

## 122 **MATERIAL AND METHODS**

### 123 **Wastewater collection**

124 Twenty-four-hour composite wastewater was collected from two hospitals (Hospital-1 and  
125 Hospital-2) and two neighborhood locations (NE1 and NW1) (Supplementary Figure 1) in the  
126 summer of 2021 across Calgary, Alberta Canada. Hospital sampling locations were chosen for  
127 their comprehensive and exclusive coverage of each site's sewershed (Acosta et al. 2021). These  
128 two hospitals encompass 47% of regional tertiary-care adult beds in the city of Calgary:  
129 Hospital-1 (Northeast Calgary, ~511 inpatient beds) and Hospital-2 (Southwest Calgary, ~611  
130 inpatient beds). Neighborhood locations were chosen based on ease of access and similar size of  
131 population served (i.e., NE1: 44,839 and NW1: 46,008), where population size was estimated  
132 based on the number of service connections (Acosta et al. 2022) and to capture populations of  
133 diverse socioeconomic backgrounds. For example, NE1 relative to NW1 had an average

134 household size of 3.78 vs NW1 2.72 individuals; percentage of constituents belonging to a  
135 visible minority of 81.1% vs 35.6 and an average household income of \$36,809 (Canadian) vs  
136 68,228 as determined using federal census data (ref). Wastewater samples were time-weighted,  
137 in which autosamplers were programmed to collect 100 ml of wastewater every 15 mins, for a  
138 total of 96 pooled samples over a period of 24 h. Samples were collected and stored on ice by  
139 City of Calgary staff using a standardized protocol (Acosta et al. 2021; Acosta et al. 2022). This  
140 project was approved by the Conjoint Regional Health Ethics Board (REB20-1252).

#### 141 **Pellet collection and culture enrichment**

142 Wastewater pelleting was adapted from a published protocol (Che et al. 2019). Briefly, two  
143 aliquots of 40 ml were taken from each composite sample after thorough mixing. Samples were  
144 centrifuged at 4200 rpm for 20 minutes at 4°C. The supernatant from each was carefully removed  
145 and discarded, and the pellets combined. The total volume of pellet recovered was recorded and  
146 used for further calculations. All processed pellet samples were either stored at -20°C before  
147 DNA extraction or were immediately plated for culture-enrichment steps.

148 In an attempt to increase detection of Gram-negative resistance mechanisms, 50 µl of each fresh  
149 pellet was plated and spread onto MacConkey agar plates supplemented with either 8µg/ml  
150 meropenem (MEM), 4µg/ml ciprofloxacin (CIP), 8µg/ml ceftriaxone (CRO) or 2µg/ml colistin  
151 (COL). Plates were incubated overnight (12 h) at 37 °C. Bacterial growth was collected by  
152 adding 1 ml of UltraPure™ DNase/RNase-Free Distilled Water (Invitrogen) to plates, physical  
153 scraping to collect growth, and the final volume collected. The total volume of the culture-  
154 enriched wastewater pellet recovered was recorded and used for further calculations. All the  
155 processed culture-enriched wastewater pellets were stored at -20°C before DNA extraction.



156 **DNA extraction, library preparation and shotgun metagenomic sequencing**

157 Aliquots of 250 µl of either the raw wastewater pellet or culture-enriched pellet were used for  
158 total genomic DNA extraction using the PowerSoil DNA Isolation Kit (Qiagen) according to the  
159 manufacturer's recommendations. An extraction blank control was included for every processed  
160 sample batch to ensure no contamination occurred. DNA concentration was measured using the  
161 Qubit fluorometer (Thermo Fisher Scientific). All extracted DNA samples were sent out for  
162 library preparation and shotgun metagenomic sequencing to Novogene Corporation Inc.,  
163 California, USA. Paired-end sequencing (2 × 150 bp) sequencing was performed on Illumina  
164 Novaseq 6000 PE150 platform with a sequencing output target of ~10 giga-bases (~33M paired  
165 reads/sample) for the raw pellets and 6 giga-bases (~20M paired reads/sample) for the culture-  
166 enriched samples (Supplementary Table 1).

167 **Bioinformatics workflow**

168 Illumina raw reads were first filtered by our sequencing provider (Novogene, USA). In  
169 particular, i) reads containing adapters were removed, ii) reads containing N>10% were  
170 removed, where N represents a base that cannot be determined; and iii) reads containing low  
171 quality (Q score ≤ 5) were removed. The base qualities and adapter contamination were double-  
172 checked by the authors using FastQC (v.0.11.9)(Andrews 2010), and further trimmed using  
173 Trimmomatic (v0.39) (Bolger, Lohse, and Usadel 2014). For annotating ARGs to the trimmed  
174 reads, we used DeepARG-SL pipeline v2.0, which aligns reads against DeepARG-DB v2.0  
175 database which includes ARGs found from multiple public databases (i.e., CARD, ARDB,  
176 UniProt, and also 16S rRNA gene databases (i.e., SILVA and Greengenes)) (Arango-Argoty et  
177 al. 2018; Arango-Argoty et al. 2016). The DeepARG-SL pipeline v2.0 outputs were subject to  
178 further analysis, for instance to calculate coverage (or ARG copy) (E1), and normalized ARG

179 abundance (E2) for each subtype homologues (e.g., OXA-1, -2, etc.) according to the customized  
180 workflow written in Python (v3.5.3).

$$181 \quad \text{Average coverage (or copy)} = \frac{\text{Number of reads} \times \text{Read length}}{\text{Reference length}} \quad 181 \quad (\text{E1})$$

$$182 \quad \text{Normalized ARG abundance} = \frac{\text{Average coverage for ARG}}{\text{Average coverage for 16S rRNA gene}} \quad 182 \quad (\text{E2})$$

184 where number of reads is the number of ARG read identified to a specific ARG; read length is  
185 the sequence length (bp) of the Illumina reads (i.e., 150 bp); reference length is the sequence  
186 length of the corresponding target ARG sequence referring to DeepARG-DB v2.0 database  
187 (Arango-Argoty et al. 2018); Number of 16S sRNA copies is the number of the 16S rRNA gene  
188 sequence identified in each sample; and the 16S rRNA gene length is the sequence length of 16S  
189 rRNA gene (i.e., 1432 bp) (Yang et al. 2016). All downstream analyses was performed using 16S  
190 rRNAs-normalized ARG abundance hereafter. Identified ARG subtypes were categorized and  
191 aggregated by ARG-types which refers to the antimicrobial agents to which each gene confers  
192 resistance (Figure 1A). The workflow using an example dataset will be available in the second  
193 author's GitHub page (<https://github.com/myjackson>) upon acceptance of this manuscript to a  
194 journal or request from reviewer. The raw reads will be available in the National Center for  
195 Biotechnology Information (NCBI) Sequence Read Archive (SRA) repository, under the  
196 BioProject ID **XXXX** (<http://www.ncbi.nlm.nih.gov/bioproject/XXXX>). The data will be  
197 released to the public when the manuscript is formally accepted for publication.

198 **ARG qPCR assays**

199 qPCR was performed to objectively quantify the absolute abundance of different ARGs of  
200 interest (i.e., *bla*<sub>CTX-M-1</sub>, *bla*<sub>KPC-3</sub>, *bla*<sub>NDM-1</sub>, *vanA*) in raw and enriched wastewater pellets. For  
201 each ARG detection, 10 µl reaction contained 5 µl of TaqMan® Fast Advanced Master Mix  
202 (Applied Biosystems), 0.5 µl of TaqMan Gene Expression assay (Thermo Fisher Scientific)  
203 (Supplementary Table 2), and 4 µl of the template DNA. For all ARG qPCR assays, the qPCR  
204 program reaction consisted of an initial step at 50°C for 2 min, then a step at 95°C for 2 min  
205 followed by 40 cycles of 95°C for 1 s, 60°C for 20 s. A 9-fold dilution series of double-stranded  
206 DNA fragments (Integrated DNA Technologies (IDT), USA) were synthesized for each ARO  
207 qPCR assay (Supplementary Table 3) and were run in triplicate on every 96-well PCR plate to  
208 produce standard curves and used to estimate the absolute quantity (copies/µl).

209 For total burden of specific antimicrobial resistant organisms (AROs) and associated  
210 determinants (i.e., *Clostridioides difficile* (CD) and *tcdA*), each 10 µl reaction contained 5 µl of  
211 TaqMan® Fast Advanced Master Mix (Applied Biosystems), 0.5 µl of a mix of forward and  
212 reverse primers, 0.5 µl of probe (Supplementary Table 2); and 4 µl of the DNA template. For  
213 both CD 16S rRNA and *tcdA* qPCR assays, the qPCR program reaction consisted of an initial  
214 step at 50°C for 2 min, then a step at 95°C for 2 min followed by 50 cycles of 95°C for 1 s, 56°C  
215 for 20 s. A 7-fold dilution series of double-stranded DNA fragments (Integrated DNA  
216 Technologies (IDT), USA) was synthesized and used (Supplementary Table 3) and were run in  
217 triplicate on every 96-well PCR plate to produce standard curves and used to estimate the  
218 absolute quantity (copies/µl).

219 For total bacterial load determination (16S rRNA gene copies/ml of wastewater), each 10 µl  
220 reaction contains 5 µl of TaqMan® Fast Advanced Master Mix (Applied Biosystems), 0.5 µl of a  
221 mix of forward and reverse primers, 0.5 µl of probe (Supplementary Table2); and 2.5 µl of the

222 DNA template. The qPCR program reaction consisted of an initial step at 50°C for 2 min, then a  
223 step at 95°C for 2 min followed by 40 cycles of 95°C for 1 s, 62 °C for 20 s. A 9-fold dilution  
224 series of *P. aeruginosa* genomic DNA PA01 strain (62.5 to 1.6 X 10<sup>-4</sup> ng/μl) was used as  
225 standard curve. Data were converted from DNA concentration (ng/μl) to 16S rRNA copy  
226 number as previously described by Zhao et al (Zhao et al. 2012). The number of 16S copies in a  
227 given reaction was multiplied by the total number of nanograms in the entire sample DNA prep  
228 and total eluted volume after DNA extraction and then divided by the volume of wastewater used  
229 for DNA extraction to give an absolute abundance of 16S copies/ml of wastewater. All samples  
230 were assayed in duplicate, and all runs contained non-template control. All qPCR reactions were  
231 carried out in the QuantStudio 5 Real-time PCR systems (Applied Biosystems).

## 232 **Statistical analysis**

233 Alpha-diversity was calculated to estimate the ARG diversity from the metagenomic sequencing  
234 data using Shannon Diversity index (SDI). SDI was compared between hospitals (n=8) and  
235 neighborhoods (n=8) locations from the culture-enriched wastewater pellet samples using Mann-  
236 Whitney test ( $\alpha=0.05$ ). Kruskal-Wallis Test was performed to test for differences in SDI  
237 across samples after culture-enrichment based on the antibiotics used. Beta-diversity clustering  
238 plots (i.e., non-metric multidimensional scaling (NMDS)) were generated using the Bray-Curtis  
239 dissimilarities metrics of the ARG-subtypes to visualise potential clustering patterns among  
240 samples. Analysis of similarity (ANOSIM) (Somerfield, Clarke, and Gorley 2021) was  
241 conducted to determine the significance of dissimilarities between/among groups. Permutational  
242 multivariate analysis of variance (PERMANOVA) tests were performed to test differences in the  
243 Bray-Curtis distance matrices. Both ANOSIM and PERMANOVA were performed with  
244 permutations=999 using the vegan package in R. Two-proportions z-test was used to evaluate the

245 richness distribution of ARG-types across all samples. When appropriate, P-values were adjusted  
246 for multiple comparisons by using Benjamini–Hochberg P-value correction for multiple testing.  
247 All data analyses and visualizations were performed in GraphPad Prism-9 software (La Jolla,  
248 CA) and in R (V4.0.4).

249

## 250 **RESULTS**

### 251 **General composition profiles of ARGs in wastewater samples**

252 Metagenomic DNA isolated from wastewater samples was used to determine ARGs profiles.  
253 Shotgun metagenomic sequencing yielded 1.24 billion raw reads; 31.8% and 68.2% of those  
254 sequences were obtained from raw wastewater pellets (n= 4) and culture-enrichment samples  
255 (n=16), respectively. Sequencing produced (mean  $\pm$  SD)  $\sim 98.6 \pm 22.1$  million raw reads per raw  
256 wastewater pellet, and  $49.7 \pm 13.7$  million reads per culture-enriched pellet sample  
257 (Supplementary Table 1). Out of the total sequenced reads, 5.3 million raw reads were  
258 successfully aligned to the DeepARG-database and used for the normalization analysis. To  
259 compare levels of ARGs between groups we normalized the abundance of each ARG by dividing  
260 raw reads by the total abundance of the 16S rRNA copies. ARGs in the all samples comprised 26  
261 main ARG-types (Figure 1A) and 1225 ARG-subtypes (Supplementary Table 4), of which the  
262 most rich (the number of different ARG-subtypes found) ARG-type that was identified was  $\beta$ -  
263 lactam resistance (57.6%), followed by multidrug (11.8%), fluoroquinolone (5.6%), macrolide-  
264 lincosamide-streptogramin (MLS) (5.4%), aminoglycoside (4.6%), tetracycline (3.9%) and  
265 glycopeptide (2.4%) resistance genes (Figure 1A). There were differences in the distribution of  
266 the proportion of some ARG-type identified between pellet and culture-enrichment samples

267 (Figure 1B). The proportion of  $\beta$ -lactam ARGs-type identified in samples selectively enriched by  
268 culture was greater than in raw pellets (adjusted P-value <0.05). In contrast, multidrug, MLS,  
269 tetracycline and glycopeptide ARGs-types identified in raw wastewater pellets was greater than  
270 in culture enriched samples (adjusted P-value <0.05).

### 271 **Composition profiles of ARGs in wastewater differs between raw wastewater pellet and** 272 **culture-enriched wastewater pellet**

273 To determine whether culture enrichment was a suitable approach for identifying ARG in  
274 wastewater samples, we calculated a normalized abundance ratio of a given ARG-type after  
275 culture enrichment relative to raw pellets (Enrichment factor (EF)). Out of the 26 ARG-types  
276 found in this study (Figure 1), 19 (73%) were found to have increased abundance compared to  
277 raw wastewater pellets regardless of the antibiotic that was used for selection (Table 1). The  
278 ARG-types categories which had the greatest increase after culture enrichment was polymyxin,  
279 (median EF of 23.9, IQR 12.1-37.9) followed by aminoglycoside:aminocoumarin,  
280 nitroimidazole, and triclosan. In contrast tetracycline, bacitracin and rifamycin had the smallest  
281 EF across all categories. A few ARG-types were found to have EF decrease after culture  
282 enrichment regardless of conditions tested (i.e., glycopeptide) or in neighborhood samples  
283 regardless of the antibiotic that was used for selection (i.e., antibacterial free fatty acids, and  
284 pleuromutilin) (Table 1). Bicyclomycin was the only ARG-type that was detected only in  
285 culture-enriched wastewater pellets but not in wastewater pellet samples.

286 To better understand the differences in resistomes across locations and conditions, we calculated  
287 the Bray-Curtis dissimilarities and found a clustering of samples based on treatment (i.e., before  
288 and after culture enrichment) and sample location (i.e., hospital and neighborhood) (Figure 2).  
289 We performed ANOSIM test and found that overall beta diversity values by treatment (ANOSIM

290 statistic  $R=0.799$ ,  $P=0.0012$ ) and sample location (ANOSIM statistic  $R=0.112$ ,  $P=0.0463$ ) were  
291 significantly different. To further test the effect of treatment and sample location we performed  
292 PERMANOVA test to determine the effect of those variable on the resistome. ARG-subtypes  
293 profiles were found to be distinguishable by treatment ( $R^2=41.7$ ,  $P=0.001$ ) but not by collection  
294 location ( $R^2=9.6$ ,  $P=0.09$ ).

295 Because  $\beta$ -lactam resistance was identified as the most diverse ARG-type and its clinical  
296 importance, we further analysed the normalized abundance ratio of specific  $\beta$ -lactamases before  
297 and after culture enrichment.  $\beta$ -lactamases were grouped by the Ambler classification and the EF  
298 was calculated. For most of the  $\beta$ -lactamases analysed there was an increase in their abundance  
299 after enrichment (Figure 3). CTX-M and AmpC had the highest average EF value regardless of  
300 the antibiotic used (101 and 90 EF, respectively). The overall average EF values were the  
301 smallest for KPC (6.7) and NDM (3.2) across all conditions (i.e., antibiotic selection) (Figure 3).  
302 However, KPC and NDM were the least abundant of these gene types, and their EF ratios for  
303 many neighborhood samples could not be calculated (indicated as FNQ) as they were only  
304 identified after enrichment (i.e., not in raw pellet). A few  $\beta$ -lactamases (i.e., OXA and GES)  
305 were found to have decreased in abundance after culture enrichment. VIM was only detected at  
306 Hospital-1 location, where the EF value was 36.3 with MEM.

307 To characterize in greater detail several of the  $\beta$ -lactamases that we observed EF values increase  
308 (i.e., CTX-M and NDM) or decrease (i.e., OXA) after culture enrichment, the normalized ARG  
309 abundance was analyzed by ARG-subtypes. We found 61 different CTX-M enzyme types, where  
310 CTX-M-90, 29 and 84 were the most abundant, found across all sample locations and antibiotic  
311 tested (Figure 4A). CTX-M 14 and CTX-M-15 variants were found in many conditions (i.e.,  
312 before and after culture enrichment) across all sample locations (Supplementary Table 4). We

313 found 10 NDM variants across all resistomes analyzed. NDM-3, 17 and 2 were the most  
314 abundant variants found across all samples (Figure 4B). Finally, we found 152 OXA enzyme  
315 variants, where OXA-1, -3 and -9 were the most abundant across all samples (Figure 4C).

### 316 **Composition profiles of ARGs in culture-enriched wastewater pellet samples**

317 ARG diversity analysis of hospital and neighbourhood wastewater from culture-enriched pellet  
318 samples was performed by measuring the Shannon diversity index (SDI). The median SDI for  
319 hospitals: 4.7 (IQR: 4.4 - 4.81) and neighborhoods: 4.43 (IQR: 3.91 - 4.54)) was significantly  
320 different between locations regardless of enrichment condition (Figure 5A,  $P < 0.05$ , Mann-  
321 Whitney test). We also analyzed the SDI to understand overall alpha-diversity across all culture-  
322 enriched conditions (Figure 5B). Median SDI was highest for wastewater enriched on  
323 MacConkey agar plates supplemented with ceftriaxone (SDI median 4.7, IQR: 4.4-4.7), followed  
324 by ciprofloxacin (SDI median 4.6, IQR: 4.4-4.7), meropenem (SDI median 4.5, IQR: 3.9-4.6)  
325 and colistin (SDI median 3.9, IQR: 3.9-4.2) ( $P < 0.05$ , Kruskal-Wallis test).

326 Clustering of wastewater resistomes in NDMS ordination plot was shown to be influenced by  
327 location sample location as demonstrated by the Ordination plot at the ARG-subtype level  
328 (Figure 5C) with similar results at ARG-type (data not shown). Similarly, NMDS ordination plot  
329 showed a separation of resistomes based on the antibiotic used for selection. The separation  
330 between hospital and neighborhoods and between antibiotic used after culture enrichment was  
331 further tested with ANOSIM (ANOSIM statistic  $R=0.187$ ,  $P=0.011$  and ANOSIM statistic  
332  $R=0.252$ ,  $P=0.004$  for sample location and antibiotic analyses, respectively) and PERMANOVA  
333 tests ( $R^2=16$ ,  $P=0.015$  and  $R^2=40.03$ ,  $P=0.004$  for sample location and antibiotic analyses,  
334 respectively).



335 Few ARG-types were identified exclusively in the resistome of raw wastewater pellets. Of those,  
336 mupirocin was the only ARG-type whose presence was only observed for all conditions and  
337 locations tested (Table 1). However, its normalized abundance was amongst the lowest of ARG-  
338 types in raw pellets ( $7.1 \times 10^{-5}$  vs  $1.4 \times 10^{-1}$ ). Similarly, oxazolidinone was only found in  
339 wastewater pellet samples with the exception that it was also found in meropenem culture-  
340 enriched wastewater pellet samples in both neighborhood locations (i.e., NE1 and NW1) (Table  
341 1). Pleuromutilin and antibacterial free fatty acids ARG-types were also only detected in pelleted  
342 samples in only hospital locations (i.e., Hospital-1 and 2) (Table 1).

### 343 **Quantitative confirmation of differential detection of target ARG**

344 We used qPCR to objectively and independently document the abundance of ARG in wastewater  
345 pellets. As  $\beta$ -lactam resistance was the most abundant ARG-type that was identified (57.6%), we  
346 quantified the absolute abundance of target  $\beta$ -lactamases in raw wastewater pellet samples  
347 relative to the total bacterial load (i.e., quantified by the 16S rRNA gene copies). Here we  
348 confirmed metagenomic observations (Supplementary Table 4) and established that *bla*<sub>CTX-M-1</sub>,  
349 *bla*<sub>KPC-3</sub> and *bla*<sub>NDM-1</sub> were 9.6-fold, 4066-fold and 5924-fold higher in raw hospital wastewater  
350 pellets compared to neighbourhood samples ( $P < 0.05$ ) (Supplementary Figure 2A). We likewise  
351 quantified the presence of *vanA* as a surrogate for Vancomycin-Resistant Enterococci (VRE),  
352 total-*C. difficile*, and one of its enterotoxins encoded by the *tcdA* gene in pelleted raw  
353 wastewater. We found that *vanA*, total-*C. difficile* and *tcdA* relative abundance were 14.5, 11.8,  
354 19.7 fold-higher in hospital than in neighborhood sites (Supplementary Figure 2B) ( $P < 0.05$ ).  
355 Finally, since the culture enrichment of wastewater pellet samples was performed on media (i.e.,  
356 MacConkey agar plates) that selects against Gram positive bacteria, we decided to confirm by  
357 qPCR that *vanA* in culture-enriched wastewater pellet samples was negatively selected. We

358 found a negative selection against the presence of *vanA* gene in MacConkey enriched wastewater  
359 relative to raw pellets (Supplementary Figure 2C).

## 360 **DISCUSSION**

361 Interest in wastewater-based surveillance (WBS) of ARO has been progressively growing. WBS  
362 provides an integrated view of ARG burden across a population that is objective, comprehensive  
363 and inclusive. Furthermore, it can be performed serially, and at a tiny fraction of the cost of serial  
364 active surveillance to monitor for changes in the prevalence of specific ARG, as might occur in  
365 the context of an outbreak (Harrington et al. 2022; Li et al. 2022). Despite the great potential of  
366 this technology, its application to hospitals has been limited to date. Hospitals are where societies  
367 sickest and most vulnerable are cohorted together to receive care. As a consequence, patients in  
368 hospital are simultaneously the most susceptible to acquiring infection and the most likely to  
369 experience adverse outcomes as a result. As 37-44% of admitted patients receive antibiotics  
370 during their hospital stay, the selection pressure for ARO colonization and subsequent infection  
371 is particularly intense and dynamic surveillance mechanisms to monitor for changing prevalence  
372 of organisms urgently required to augment antimicrobial stewardship and infection control  
373 programs (Taylor et al. 2015; Tan et al. 2017; Rudnick et al. 2020; Hocquet, Muller, and  
374 Bertrand 2016) . Importantly, this work established that the resistome of hospitals differed  
375 significantly from community derived samples, and ARG of notable nosocomial pathogens were  
376 markedly increased.

377 Several early approaches have been used for the analysis of AMR in hospital wastewater. For  
378 example, Buelow and collaborators (2018) studied the resistome hospital wastewater compared  
379 to receiving urban wastewater but identified only a few ARGs using a high-throughput qPCR  
380 (Buelow et al. 2018). Other studies have only been focused on the characterization of the

381 diversity of specific ARGs (e.g., ESBLs and KPCs) in hospital wastewater using culture  
382 dependent methodologies (Adekanmbi et al. 2020; Chagas et al. 2011). Culture based studies  
383 have identified carbapenemase producing organisms both exclusively in WWTP receiving  
384 wastewater from hospitals (Ludden et al. 2017) or across all monitored sites irrespective of  
385 contributing hospitals (Blaak et al. 2021). Early metagenomic approaches have been described  
386 using hospital wastewater (Rodriguez-Mozaz et al. 2015; Petrovich et al. 2020; Duong et al.  
387 2008; Fuentefria, Ferreira, and Corcao 2011; Szekeres et al. 2017; Hutinel, Larsson, and Flach  
388 2022; Hocquet, Muller, and Bertrand 2016) however, no study has utilized culture-enrichment to  
389 study in more greater detail the resistome of complex samples such as hospital wastewater  
390 samples. Furthermore, by comparing resistomes from multiple hospitals and neighborhoods, we  
391 have increased the robustness of these observations.

392 Using complementary metagenomic and culture enrichment we identified the presence of ARG  
393 encoding resistance to  $\beta$ -lactam, multidrug, fluoroquinolone, MLS, aminoglycoside, tetracycline,  
394 glycopeptide, diaminopyrimidine, phenicol, fosfomicin, and others. The most diverse ARGs-  
395 types detected conferred resistance to  $\beta$ -lactam in both hospital and neighborhood wastewater.  
396 We found that the alpha diversity of ARGs found after cultured enrichment were higher in  
397 hospital samples compared to neighborhoods. Similar to our results, a previous study showed  
398 that hospital wastewater was found to be richer in ARGs than the other type of samples (e.g.,  
399 urban wastewater), particularly when comparing ARGs-types related with  $\beta$ -lactam and  
400 vancomycin resistance genes (~15-fold and ~175 fold higher in hospital wastewater,  
401 respectively) (Buelow et al. 2018). These results are also supported by previous studies that have  
402 demonstrated that hospital wastewater contains richer and high abundances of ARGs than  
403 municipal which has been extrapolated to relate to higher burden of ARG colonization amongst

404 hospitalized individuals (Petrovich et al. 2020; Paulus et al. 2019). Even in the “environmental”  
405 One Health compartment, the high concentrations of antibiotics in hospital wastewater relative to  
406 municipal wastewater create selective pressure on the microbiota driving resistance (Szekeres et  
407 al. 2017). Hospital wastewater therefore serve as a particular hotspot for ARGs and AROs  
408 dissemination across the watershed, into the environment and ultimately into humans and  
409 animals (Kaur, Yadav, and Tyagi 2020; Rodriguez-Mozaz et al. 2015; Rizzo et al. 2013;  
410 Vlahović-Palčevski et al. 2007; Robert et al. 2012). Cai et al. (2021), performed weekly WBS of  
411 a single ~250 bed hospital in Shantou, China for ARG using metagenomics over a period of  
412 several months. They compared their wastewater derived data with pathogens from 104  
413 individuals (16% of submitted clinical specimens) and used network analysis to demonstrate  
414 strong correlations with many ARG-types and recovered clinical pathogens (Cai et al. 2021).

415 Although metagenomic sequencing is a robust approach for ARGs identification and  
416 characterization relative to traditional targeted studies, next-generation sequencing (NGS)  
417 requires tremendous sequencing depth in order to effectively identify AMR due to its low  
418 sensitivity and lower limit of detection (Lanza et al. 2018; Guitor et al. 2019). Coupling limited  
419 selective culture-enrichment of wastewater with metagenomic sequencing allowed us to detect a  
420 range of ARG sub-types (including clinically important KPCs, NDMs and VIM metallo-beta-  
421 lactamases) that would otherwise not have been detected, despite a sequencing depth less than  
422 half of the raw pellets. Such an approach can manifest in significant cost savings – particularly  
423 relevant for high volume longitudinal monitoring programs. Interestingly, increased detection of  
424 these targets occurred using ciprofloxacin in addition to both the beta-lactams; meropenem and  
425 ceftriaxone, likely relating to the co-location of ARG on transmissible mobile elements in  
426 resistant pathogens (Parkins et al. 2007). The exceptional enrichment agent was colistin, which

427 negatively selected against carbapenemases, and only modestly enriched for *mcr-1* which was  
428 exceedingly infrequent in the samples collected (NE-1 and NW-1). We identified bicyclomycin  
429 ARG, uniquely in the culture-enriched wastewater pellet samples. Antibiotic resistant to  
430 bicyclomycin is mediated by a transmembrane protein that excludes it from penetrating the cell  
431 (Malik et al. 2014) and it has been found in *P. aeruginosa* strains responsible for outbreaks  
432 (Fonseca et al. 2015).

433 A common critique of metagenomic studies is the inability to distinguish between live and dead  
434 organisms, particularly relevant if infection control measures are to be implemented based on  
435 wastewater data. Culture enrichment negates this. Only a few studies have used a similar  
436 approach of culture enrichment, but they have only focused on AMR in influent and effluent  
437 municipal wastewater rather than hospitals. Zhang and collaborators (2022) assessed the  
438 resistome through culture enriched phenotypic metagenomics in municipal wastewater treatment  
439 plant and its receiving river samples. This study detected a greater diversity and number of  
440 ARGs when coupling culture enrichment and metagenomic analysis than direct metagenomic  
441 sequencing, with a particular focus on carbapenemase and ESBLs (Zhang, Zhang, and Ju 2022).  
442 Marano and collaborators (2021) used culture-enrichment under copiotrophic conditions to  
443 enrich and determine the microbiome and resistomes of AROs and ARGs in soil that was  
444 irrigated with treated-wastewater. They observed that cephalosporin and carbapenem resistant  
445 *Enterobacterales* only after culture enrichment and not in raw soil samples (Marano et al. 2021).  
446 Other alternatives to culture enrichment prior to metagenomic analysis consist of using  
447 commercially available AMR target enrichment NGS panels (Harrington et al. 2022).  
448 Targeted surveillance of specific clinically relevant ARG serves to complement metagenomic  
449 assessments. Indeed, others have suggested that this approach has increased sensitivity relative to

450 shot gun metagenomics (Miłobedzka et al. 2022). Using this approach, we demonstrated marked  
451 increase in clinically relevant ARG in hospital wastewater pellets relative to community samples  
452 including  $\beta$ -lactamases from nosocomial Gram negatives (i.e., CTX-M ESBLs, KPCs and NDM)  
453 and Gram-positive pathogens (i.e., total *C. difficile* and *tcdA*, and *vanA* from VRE).

454 This study has several notable limitations. We specifically used a lower sequencing target depth  
455 in culture enrichment samples in order to assess if this process could manifest in cost savings for  
456 identification of ultra-rare ARG. Owing to this difference, we were unable able to perform direct  
457 comparisons in terms of SDI between these data sets. The use of selective culture enrichment,  
458 designed to increase the identification of any particular target, will conversely mask alternates.  
459 As our goal was to assess for ultra-rare carbapenemases presumed to colonize a tiny fraction of  
460 the population where it is a minor constituent within resident microbiota, we enriched with  
461 MacConkey agar and appropriate antibiotics to select for these mechanisms. In doing so, we  
462 selected against other clinically relevant nosocomial pathogens (i.e., VRE and other Gram  
463 positives) which were however readily identified owing to their increased prevalence and  
464 abundance in colonized/infected individuals. This study did not assess the relationship between  
465 antibiotics released into hospital wastewater and abundance of ARGs found in those samples.  
466 Only a few studies have looked at that matter and it has been found a correlation between  
467 antibiotic concentrations and resistance in wastewater (Rodriguez-Mozaz et al. 2015; Gao,  
468 Munir, and Xagorarakis 2012). Finally, we did not identify the taxonomic identity of those  
469 organisms carrying ARG, nor did we assess the role of mobile genetic elements in distribution of  
470 antimicrobial resistance in hospital and community samples. However, culture-based enrichment  
471 offers the potential to retrospectively go back and attempt to recover individual pathogens

472 carrying an ARG-type of interest for greater characterization through whole genome sequencing  
473 analysis.

#### 474 **Conclusion**

475 Here we were able to demonstrate using multiple independent sampling locations and  
476 complementary modalities (i.e., metagenomics and qPCR) that the resistome of hospitals, differs  
477 from communities, and is particularly enriched for beta-lactam resistance and nosocomial  
478 pathogens such as VRE and *C. difficile*. By adopting a simple, semi-selective culture enrichment  
479 step we were able to identify ultra-rare, and clinically relevant ARG such as NDM and KPC  
480 while simultaneously reducing the costs associated with sequencing. Wastewater-based  
481 surveillance is a potentially extremely important and powerful tool that warrants exploration as a  
482 tool to augment hospital-based infection control and antimicrobial stewardship programs.

483

#### 484 **FUNDING**

485 This work was supported by grants from the Canadian Institutes of Health Research [448242 to  
486 M.D.P.]

#### 487 **ACKNOWLEDGMENTS**

488 The investigators are grateful to the staff of the City of Calgary Water Services for their support  
489 in providing wastewater samples for assessment.

490

491 **REFERENCES**

- 492 Acosta, Nicole, María A. Bautista, Jordan Hollman, Janine McC Calder, Alexander Buchner Beaudet,  
493 Lawrence Man, Barbara J. Waddell, Jianwei Chen, Carmen Li, Darina Kuzma, Srijak Bhatnagar,  
494 Jenine Leal, Jon Meddings, Jia Hu, Jason L. Cabaj, Norma J. Ruecker, Christopher Naugler, Dylan  
495 R. Pillai, Gopal Achari, M. Cathryn Ryan, John M. Conly, Kevin Frankowski, Casey R. J. Hubert,  
496 and Michael D. Parkins. 2021. 'A Multicenter Study Investigating SARS-CoV-2 in Tertiary-Care  
497 Hospital Wastewater. Viral burden correlates with increasing hospitalized cases as well as  
498 hospital-associated transmissions and outbreaks', *Water Research*: 117369.
- 499 Acosta, Nicole, María A. Bautista, Barbara J. Waddell, Kristine Du, Janine McC Calder, Puja Pradhan, Navid  
500 Sedaghat, Chloe Papparis, Alexander Buchner Beaudet, Jianwei Chen, Jennifer Van Doorn, Kevin  
501 Xiang, Leslie Chan, Laura Vivas, Kashtin Low, Xuewen Lu, Jangwoo Lee, Paul Westlund, Thierry  
502 Chekouo, Xiaotian Dai, Jason Cabaj, Srijak Bhatnagar, Norma Ruecker, Gopal Achari, Rhonda G.  
503 Clark, Craig Pearce, Joe J. Harrison, Jon Meddings, Jenine Leal, Jennifer Ellison, Bayan Missaghi,  
504 Jamil N. Kanji, Oscar Larios, Elissa Rennert-May, Joseph Kim, Steve E. Hruday, Bonita E. Lee,  
505 Xiaoli Pang, Kevin Frankowski, John Conly, Casey R. J. Hubert, and Michael D. Parkins. 2023.  
506 'Surveillance for SARS-CoV-2 and its variants in wastewater of tertiary care hospitals correlates  
507 with increasing case burden and outbreaks', *Journal of Medical Virology*, 95: e28442.
- 508 Acosta, Nicole, María A. Bautista, Barbara J. Waddell, Janine McC Calder, Alexander Buchner Beaudet,  
509 Lawrence Man, Puja Pradhan, Navid Sedaghat, Chloe Papparis, Andra Bacanu, Jordan Hollman,  
510 Alexander Krusina, Danielle A. Southern, Tyler Williamson, Carmen Li, Srijak Bhatnagar, Sean  
511 Murphy, Jianwei Chen, Darina Kuzma, Rhonda Clark, Jon Meddings, Jia Hu, Jason L. Cabaj, John  
512 M. Conly, Xiaotian Dai, Xuewen Lu, Thierry Chekouo, Norma J. Ruecker, Gopal Achari, M.  
513 Cathryn Ryan, Kevin Frankowski, Casey R. J. Hubert, and Michael D. Parkins. 2022. 'Longitudinal  
514 SARS-CoV-2 RNA wastewater monitoring across a range of scales correlates with total and  
515 regional COVID-19 burden in a well-defined urban population', *Water Research*, 220: 118611.
- 516 Adekanmbi, Abimbola Olumide, Miracle Opeyemi Akinpelu, Adedolapo Victoria Olaposi, and Abolade A.  
517 Oyelade. 2020. 'Diversity of Extended Spectrum Beta-lactamase (ESBL) genes in Escherichia coli  
518 isolated from wastewater generated by a Sick Bay located in a University Health Care Facility',  
519 *Gene Reports*, 20: 100738.
- 520 Andrews, Simon. 2010. "FastQC: a quality control tool for high throughput sequence data." In:  
521 Babraham Bioinformatics, Babraham Institute, Cambridge, United Kingdom.
- 522 Arango-Argoty, Gustavo, Emily Garner, Amy Pruden, Lenwood S. Heath, Peter Vikesland, and Liqing  
523 Zhang. 2018. 'DeepARG: a deep learning approach for predicting antibiotic resistance genes  
524 from metagenomic data', *Microbiome*, 6: 23.
- 525 Arango-Argoty, Gustavo, Gargi Singh, Lenwood S. Heath, Amy Pruden, Weidong Xiao, and Liqing Zhang.  
526 2016. 'MetaStorm: A Public Resource for Customizable Metagenomics Annotation', *PLOS ONE*,  
527 11: e0162442.
- 528 Blaak, Hetty, Merel A. Kemper, Heleen de Man, Jeroen P. G. van Leuken, Jack F. Schijven, Mark W. J. van  
529 Passel, Heike Schmitt, and Ana Maria de Roda Husman. 2021. 'Nationwide surveillance reveals  
530 frequent detection of carbapenemase-producing Enterobacterales in Dutch municipal  
531 wastewater', *Science of The Total Environment*, 776: 145925.
- 532 Bolger, Anthony M, Marc Lohse, and Bjoern Usadel. 2014. 'Trimmomatic: a flexible trimmer for Illumina  
533 sequence data', *Bioinformatics*, 30: 2114-20.
- 534 Buelow, Elena, Jumamurat R Bayjanov, Eline Majoor, Rob JL Willems, Marc JM Bonten, Heike Schmitt,  
535 and Willem van Schaik. 2018. 'Limited influence of hospital wastewater on the microbiome and  
536 resistome of wastewater in a community sewerage system', *FEMS Microbiology Ecology*, 94.



- 537 Cai, Leshan, Jiayu Sun, Fen Yao, Yumeng Yuan, Mi Zeng, Qiaoxin Zhang, Qingdong Xie, Shiwei Wang,  
538 Zhen Wang, and Xiaoyang Jiao. 2021. 'Antimicrobial resistance bacteria and genes detected in  
539 hospital sewage provide valuable information in predicting clinical antimicrobial resistance',  
540 *Science of The Total Environment*, 795: 148815.
- 541 Chagas, TPG, LM Seki, DM Da Silva, and MD Asensi. 2011. 'Occurrence of KPC-2-producing *Klebsiella*  
542 *pneumoniae* strains in hospital wastewater', *Journal of Hospital Infection*, 77: 281.
- 543 Chan, W. W., G. Peirano, D. J. Smyth, and J. D. Pitout. 2013. 'The characteristics of *Klebsiella*  
544 *pneumoniae* that produce KPC-2 imported from Greece', *Diagn Microbiol Infect Dis*, 75: 317-9.
- 545 Che, You, Yu Xia, Lei Liu, An-Dong Li, Yu Yang, and Tong Zhang. 2019. 'Mobile antibiotic resistome in  
546 wastewater treatment plants revealed by Nanopore metagenomic sequencing', *Microbiome*, 7:  
547 44.
- 548 Choi, PM, O'Brien, JW, Tscharke, BJ, Mueller, JF, Thomas, KV and S Samanipour. 2020. 'Population  
549 Socioeconomics Predicted Using Wastewater', *Environ Sci. Technol. Lett.*, 7: 567-72.
- 550 Cosgrove, Sara E., George Sakoulas, Eli N. Perencevich, Mitchell J. Schwaber, Adolf W. Karchmer, and  
551 Yehuda Carmeli. 2003. 'Comparison of Mortality Associated with Methicillin-Resistant and  
552 Methicillin-Susceptible *Staphylococcus aureus* Bacteremia: A Meta-analysis', *Clinical Infectious*  
553 *Diseases*, 36: 53-59.
- 554 Doyle, D., G. Peirano, C. Lascols, T. Lloyd, D. L. Church, and J. D. Pitout. 2012. 'Laboratory detection of  
555 Enterobacteriaceae that produce carbapenemases', *J Clin Microbiol*, 50: 3877-80.
- 556 Duong, H. A., N. H. Pham, H. T. Nguyen, T. T. Hoang, H. V. Pham, V. C. Pham, M. Berg, W. Giger, and A. C.  
557 Alder. 2008. 'Occurrence, fate and antibiotic resistance of fluoroquinolone antibacterials in  
558 hospital wastewaters in Hanoi, Vietnam', *Chemosphere*, 72: 968-73.
- 559 Finaly B, J Conly, JR Dillon, G Douglas, E Goodard, L Gregco, LE Nicolle, D Patrick, JF Prescott, Quesnel-  
560 Vallee A, R Smith, and G Wright. 2019. *When Antibiotics Fail: The Expert Panel on the Potential*  
561 *Socio-Economic Impacts of Antimicrobial Resistance in Canada* (Council of Canadian Academies).
- 562 Fleres, G., N. Couto, L. Schuele, M. A. Chlebowicz, C. I. Mendes, L. W. M. van der Sluis, J. W. A. Rossen, A.  
563 W. Friedrich, and S. Garcia-Cobos. 2019. 'Detection of a novel mcr-5.4 gene variant in hospital  
564 tap water by shotgun metagenomic sequencing', *J Antimicrob Chemother*, 74: 3626-28.
- 565 Fonseca, Erica L., Michel A. Marin, Fernando Encinas, and Ana Carolina P. Vicente. 2015. 'Full  
566 characterization of the integrative and conjugative element carrying the metallo- $\beta$ -lactamase  
567 blaSPM-1 and bicyclomycin bcr1 resistance genes found in the pandemic *Pseudomonas*  
568 *aeruginosa* clone SP/ST277', *Journal of Antimicrobial Chemotherapy*, 70: 2547-50.
- 569 Fuentefria, D. B., A. E. Ferreira, and G. Corcao. 2011. 'Antibiotic-resistant *Pseudomonas aeruginosa* from  
570 hospital wastewater and superficial water: are they genetically related?', *J Environ Manage*, 92:  
571 250-5.
- 572 Galani, Aikaterini, Reza Aalizadeh, Marios Kostakis, Athina Markou, Nikiforos Alygizakis, Theodore Lytras,  
573 Panagiotis G. Adamopoulos, Jordan Peccia, David C. Thompson, Aikaterini Kontou, Apostolos  
574 Karagiannidis, Evi S. Lianidou, Margaritis Avgeris, Dimitrios Paraskevis, Sotirios Tsiodras, Andreas  
575 Scorilas, Vasilis Vasiliou, Meletios-Athanasios Dimopoulos, and Nikolaos S. Thomaidis. 2022.  
576 'SARS-CoV-2 wastewater surveillance data can predict hospitalizations and ICU admissions',  
577 *Science of The Total Environment*, 804: 150151.
- 578 Gao, Pin, Mariya Munir, and Irene Xagorarakis. 2012. 'Correlation of tetracycline and sulfonamide  
579 antibiotics with corresponding resistance genes and resistant bacteria in a conventional  
580 municipal wastewater treatment plant', *Science of The Total Environment*, 421: 173-83.
- 581 Ghantouji, S. S., K. Sail, D. R. Lairson, H. L. DuPont, and K. W. Garey. 2010. 'Economic healthcare costs of  
582 *Clostridium difficile* infection: a systematic review', *Journal of Hospital Infection*, 74:  
583 309-18.

- 584 Guitor, Allison K., Amogelang R. Raphenya, Jennifer Klunk, Melanie Kuch, Brian Alcock, Michael G.  
585 Surette, Andrew G. McArthur, Hendrik N. Poinar, and Gerard D. Wright. 2019. 'Capturing the  
586 Resistome: a Targeted Capture Method To Reveal Antibiotic Resistance Determinants in  
587 Metagenomes', *Antimicrobial Agents and Chemotherapy*, 64: e01324-19.
- 588 Harrington, Anthony, Van Vo, Katerina Papp, Richard L. Tillett, Ching-Lan Chang, Hayley Baker, Shirley  
589 Shen, Amei Amei, Cassius Lockett, Daniel Gerrity, and Edwin C. Oh. 2022. 'Urban monitoring of  
590 antimicrobial resistance during a COVID-19 surge through wastewater surveillance', *Science of  
591 The Total Environment*, 853: 158577.
- 592 Hegazy, Nada, Aaron Cowan, Patrick M. D'Aoust, Élisabeth Mercier, Syeda Tasneem Towhid, Jian-Jun Jia,  
593 Shen Wan, Zhihao Zhang, Md Pervez Kabir, Wanting Fang, Tyson E. Graber, Alex E. MacKenzie,  
594 Stéphanie Guilherme, and Robert Delatolla. 2022. 'Understanding the dynamic relation between  
595 wastewater SARS-CoV-2 signal and clinical metrics throughout the pandemic', *Science of The  
596 Total Environment*, 853: 158458.
- 597 Hocquet, D., A. Muller, and X. Bertrand. 2016. 'What happens in hospitals does not stay in hospitals:  
598 antibiotic-resistant bacteria in hospital wastewater systems', *Journal of Hospital Infection*, 93:  
599 395-402.
- 600 Holland, M. S., D. Nobrega, G. Peirano, C. Naugler, D. L. Church, and J. D. D. Pitout. 2020. 'Molecular  
601 epidemiology of Escherichia coli causing bloodstream infections in a centralized Canadian  
602 region: a population-based surveillance study', *Clin Microbiol Infect*, 26: 1554 e1-54 e8.
- 603 Hubert, Casey R. J., Nicole Acosta, Barbara J. M. Waddell, Maria Hasing, Yuanyuan Qiu, Meghan Fuzzen,  
604 Nathanael B. J. Harper, Maria Bautista, Tiejun Gao, Chloe Papparis, Jenn Van Doorn, Kristine Du,  
605 Kevin Xiang, Leslie Chan, Laura Vivas, Puja Pradhan, Janine McCalder, Kashtin Low, Whitney  
606 England, Darina Kuzma, John Conly, M. Cathryn Ryan, Gopal Achari, Jia Hu, Jason Cabaj, Chris  
607 Sikora, Larry Svenson, Nathan Zelyas, Mark Servos, Jon Meddings, Steve Hruday, Kevin  
608 Frankowski, Michael Parkins, Xiaoli Pang, and Bonita Lee. 2022. 'Tracking Emergence and Spread  
609 of SARS-CoV-2 Omicron Variant in Large and Small Communities by Wastewater Monitoring in  
610 Alberta, Canada', *Emerging Infectious Disease journal*, 28.
- 611 Hutinel, M., D. G. J. Larsson, and C. F. Flach. 2022. 'Antibiotic resistance genes of emerging concern in  
612 municipal and hospital wastewater from a major Swedish city', *Sci Total Environ*, 812: 151433.
- 613 Kaur, R., B. Yadav, and R. D. Tyagi. 2020. *Microbiology of hospital wastewater* (Current Developments in  
614 Biotechnology and Bioengineering. 2020:103-48. doi: 10.1016/B978-0-12-819722-6.00004-3.  
615 Epub 2020 May 1.).
- 616 Lanza, Val F., Fernando Baquero, José Luís Martínez, Ricardo Ramos-Ruíz, Bruno González-Zorn, Antoine  
617 Andremont, Antonio Sánchez-Valenzuela, Stanislav Dusko Ehrlich, Sean Kennedy, Etienne  
618 Ruppé, Willem van Schaik, Rob J. Willems, Fernando de la Cruz, and Teresa M. Coque. 2018. 'In-  
619 depth resistome analysis by targeted metagenomics', *Microbiome*, 6: 11.
- 620 Li, Wenxuan, Feijian Mao, Charmaine Ng, Mui Choo Jong, Shin Giek Goh, Francis Rathinam Charles, Oon  
621 Tek Ng, Kalisvar Marimuthu, Yiliang He, and Karina Yew-Hoong Gin. 2022. 'Population-based  
622 variations of a core resistome revealed by urban sewage metagenome surveillance',  
623 *Environment International*, 163: 107185.
- 624 Lira, F., I. Vaz-Moreira, J. Tamames, C. M. Manaia, and J. L. Martinez. 2020. 'Metagenomic analysis of an  
625 urban resistome before and after wastewater treatment', *Sci Rep*, 10: 8174.
- 626 Ludden, C., S. Reuter, K. Judge, T. Gouliouris, B. Blane, F. Coll, P. Naydenova, M. Hunt, A. Tracey, K. L.  
627 Hopkins, N. M. Brown, N. Woodford, J. Parkhill, and S. J. Peacock. 2017. 'Sharing of  
628 carbapenemase-encoding plasmids between Enterobacteriaceae in UK sewage uncovered by  
629 MinION sequencing', *Microb Genom*, 3: e000114.

- 630 Malik, Muhammad, Liping Li, Xilin Zhao, Robert J. Kerns, James M. Berger, and Karl Drlica. 2014. 'Lethal  
631 synergy involving bicyclomycin: an approach for reviving old antibiotics', *Journal of Antimicrobial*  
632 *Chemotherapy*, 69: 3227-35.
- 633 Marano, Roberto B. M., Chhedi Lal Gupta, Tamar Cozer, Edouard Jurkevitch, and Eddie Cytryn. 2021.  
634 'Hidden Resistome: Enrichment Reveals the Presence of Clinically Relevant Antibiotic Resistance  
635 Determinants in Treated Wastewater-Irrigated Soils', *Environmental Science & Technology*, 55:  
636 6814-27.
- 637 Matsumura, Y., G. Peirano, P. A. Bradford, M. R. Motyl, R. DeVinney, and J. D. D. Pitout. 2018. 'Genomic  
638 characterization of IMP and VIM carbapenemase-encoding transferable plasmids of  
639 Enterobacteriaceae', *J Antimicrob Chemother*, 73: 3034-38.
- 640 Mitobedzka, Aleksandra, Catarina Ferreira, Ivone Vaz-Moreira, David Calderón-Franco, Adrian Gorecki,  
641 Sabina Purkrtova, Bartacek Jan, Lukasz Dziewit, Caitlin M. Singleton, Per Halkjær Nielsen, David  
642 Gregory Weissbrodt, and Céilia M. Manaia. 2022. 'Monitoring antibiotic resistance genes in  
643 wastewater environments: The challenges of filling a gap in the One-Health cycle', *Journal of*  
644 *Hazardous Materials*, 424: 127407.
- 645 Mitchell, Jessica, Alex J O'Neill, and Rebecca King. 2022. 'Creating a framework to align antimicrobial  
646 resistance (AMR) research with the global guidance: a viewpoint', *Journal of Antimicrobial*  
647 *Chemotherapy*, 77: 2315-20.
- 648 Mittal, P, Prasoodanan, V, Dhakan, DB, Kumar, S and VK Sharma. 2019. 'Metagenome of a polluted river  
649 reveals a reservoir of metabolic and antibiotic resistance genes', *Environmental Microbiol*, 14: 1-  
650 12.
- 651 Miyani, Brijen, Liang Zhao, Maddie Spooner, Sejal Buch, Zachary Gentry, Anna Mehrotra, John Norton,  
652 and Irene Xagorarakis. 2021. 'Early Warnings of COVID-19 Second Wave in Detroit', *Journal of*  
653 *Environmental Engineering*, 147: 06021004.
- 654 Morata, L., N. Cobos-Trigueros, J. A. Martinez, A. Soriano, M. Almela, F. Marco, H. Sterzik, R. Nunez, C.  
655 Hernandez, and J. Mensa. 2012. 'Influence of multidrug resistance and appropriate empirical  
656 therapy on the 30-day mortality rate of Pseudomonas aeruginosa bacteremia', *Antimicrob*  
657 *Agents Chemother*, 56: 4833-7.
- 658 Mulvey, Michael R., and Andrew E. Simor. 2009. 'Antimicrobial resistance in hospitals: How concerned  
659 should we be?', *Canadian Medical Association Journal*, 180: 408-15.
- 660 Parkins, M. D., J. D. Pitout, D. L. Church, J. M. Conly, and K. B. Laupland. 2007. 'Treatment of infections  
661 caused by metallo-beta-lactamase-producing Pseudomonas aeruginosa in the Calgary Health  
662 Region', *Clin Microbiol Infect*, 13: 199-202.
- 663 Paulus, Gabriela K., Luc M. Hornstra, Nikiforos Alygizakis, Jaroslav Slobodnik, Nikolaos Thomaidis, and  
664 Gertjan Medema. 2019. 'The impact of on-site hospital wastewater treatment on the  
665 downstream communal wastewater system in terms of antibiotics and antibiotic resistance  
666 genes', *International Journal of Hygiene and Environmental Health*, 222: 635-44.
- 667 Peccia, J., A. Zulli, D. E. Brackney, N. D. Grubaugh, E. H. Kaplan, A. Casanovas-Massana, A. I. Ko, A. A.  
668 Malik, D. Wang, M. Wang, J. L. Warren, D. M. Weinberger, W. Arnold, and S. B. Omer. 2020.  
669 'Measurement of SARS-CoV-2 RNA in wastewater tracks community infection dynamics', *Nat*  
670 *Biotechnol*, 38: 1164-67.
- 671 Peirano, G., T. Lynch, Y. Matsumura, D. Nobrega, T. J. Finn, R. DeVinney, and J. D. D. Pitout. 2020. 'Trends  
672 in Population Dynamics of Escherichia coli Sequence Type 131, Calgary, Alberta, Canada, 2006-  
673 2016(1)', *Emerging infectious diseases*, 26: 2907-15.
- 674 Peirano, G., Y. Matsumura, M. D. Adams, P. Bradford, M. Motyl, L. Chen, B. N. Kreiswirth, and J. D. D.  
675 Pitout. 2018. 'Genomic Epidemiology of Global Carbapenemase-Producing Enterobacter spp.,  
676 2008-2014', *Emerging infectious diseases*, 24: 1010-19.

- 677 Peirano, G., J. H. Sang, A. Pitondo-Silva, K. B. Laupland, and J. D. Pitout. 2012. 'Molecular epidemiology  
678 of extended-spectrum-beta-lactamase-producing *Klebsiella pneumoniae* over a 10 year period  
679 in Calgary, Canada', *J Antimicrob Chemother*, 67: 1114-20.
- 680 Petrovich, M. L., A. Zilberman, A. Kaplan, G. R. Eliraz, Y. Wang, K. Langenfeld, M. Duhaime, K. Wigginton,  
681 R. Poretsky, D. Avisar, and G. F. Wells. 2020. 'Microbial and Viral Communities and Their  
682 Antibiotic Resistance Genes Throughout a Hospital Wastewater Treatment System', *Front*  
683 *Microbiol*, 11: 153.
- 684 Pitout, J. D., D. B. Gregson, D. L. Church, and K. B. Laupland. 2007. 'Population-based laboratory  
685 surveillance for AmpC beta-lactamase-producing *Escherichia coli*, Calgary', *Emerging infectious*  
686 *diseases*, 13: 443-8.
- 687 Pitout, J. D., D. B. Gregson, L. Poirel, J. A. McClure, P. Le, and D. L. Church. 2005. 'Detection of  
688 *Pseudomonas aeruginosa* producing metallo-beta-lactamases in a large centralized laboratory', *J*  
689 *Clin Microbiol*, 43: 3129-35.
- 690 Pitout, J. D., N. D. Hanson, D. L. Church, and K. B. Laupland. 2004. 'Population-based laboratory  
691 surveillance for *Escherichia coli*-producing extended-spectrum beta-lactamases: importance of  
692 community isolates with blaCTX-M genes', *Clin Infect Dis*, 38: 1736-41.
- 693 Pitout, J. D., P. Nordmann, K. B. Laupland, and L. Poirel. 2005. 'Emergence of Enterobacteriaceae  
694 producing extended-spectrum beta-lactamases (ESBLs) in the community', *J Antimicrob*  
695 *Chemother*, 56: 52-9.
- 696 Randazzo, Walter, Pilar Truchado, Enric Cuevas-Ferrando, Pedro Simón, Ana Allende, and Gloria  
697 Sánchez. 2020. 'SARS-CoV-2 RNA in wastewater anticipated COVID-19 occurrence in a low  
698 prevalence area', *Water Research*, 181: 115942-42.
- 699 Rizzo, L, C Manaia, C Merlin, T Schwartz, C Dagot, MC Ploy, I Michael, and Despo Fatta-Kassinou. 2013.  
700 'Urban wastewater treatment plants as hotspots for antibiotic resistant bacteria and genes  
701 spread into the environment: a review', *Science of The Total Environment*, 447: 345-60.
- 702 Robert, J, Y Péan, E Varon, J-P Bru, J-P Bedos, Xavier Bertrand, A Lepape, J-P Stahl, and R Gauzit. 2012.  
703 'Point prevalence survey of antibiotic use in French hospitals in 2009', *Journal of Antimicrobial*  
704 *Chemotherapy*, 67: 1020-26.
- 705 Rodriguez-Mozaz, S., S. Chamorro, E. Marti, B. Huerta, M. Gros, A. Sanchez-Melsio, C. M. Borrego, D.  
706 Barcelo, and J. L. Balcazar. 2015. 'Occurrence of antibiotics and antibiotic resistance genes in  
707 hospital and urban wastewaters and their impact on the receiving river', *Water Res*, 69: 234-42.
- 708 Rudnick, W., M. Science, D. J. G. Thirion, K. Abdesselam, K. B. Choi, L. Pelude, K. Amaratunga, J. L.  
709 Comeau, B. Dalton, J. Delpont, R. Dhami, J. Embree, Y. Emond, G. Evans, C. Frenette, S. Fryters,  
710 G. German, J. M. Grant, J. Happe, K. Katz, P. Kibsey, J. Kosar, J. M. Langley, B. E. Lee, M. A.  
711 Lefebvre, J. A. Leis, A. McGeer, H. L. Neville, A. Simor, K. Slayter, K. N. Suh, A. Tse-Chang, K.  
712 Weiss, J. Conly, and Program Canadian Nosocomial Infection Surveillance. 2020. 'Antimicrobial  
713 use among adult inpatients at hospital sites within the Canadian Nosocomial Infection  
714 Surveillance Program: 2009 to 2016', *Antimicrob Resist Infect Control*, 9: 32.
- 715 Sims, Natalie, and Barbara Kasprzyk-Hordern. 2020. 'Future perspectives of wastewater-based  
716 epidemiology: Monitoring infectious disease spread and resistance to the community level',  
717 *Environment International*, 139: 105689.
- 718 Somerfield, Paul J., K. Robert Clarke, and Ray N. Gorley. 2021. 'A generalised analysis of similarities  
719 (ANOSIM) statistic for designs with ordered factors', *Austral Ecology*, 46: 901-10.
- 720 Stoesser, N., A. E. Sheppard, G. Peirano, L. W. Anson, L. Pankhurst, R. Sebra, H. T. T. Phan, A. Kasarskis,  
721 A. J. Mathers, T. E. A. Peto, P. Bradford, M. R. Motyl, A. S. Walker, D. W. Crook, and J. D. Pitout.  
722 2017. 'Genomic epidemiology of global *Klebsiella pneumoniae* carbapenemase (KPC)-producing  
723 *Escherichia coli*', *Sci Rep*, 7: 5917.

- 724 Strathdee, Steffanie A., Sally C. Davies, and Jasmine R. Marcelin. 2020. 'Confronting antimicrobial  
725 resistance beyond the COVID-19 pandemic and the 2020 US election', *The Lancet*, 396: 1050-53.
- 726 Szekeres, E., A. Baricz, C. M. Chiriac, A. Farkas, O. Opris, M. L. Soran, A. S. Andrei, K. Rudi, J. L. Balcazar,  
727 N. Dragos, and C. Coman. 2017. 'Abundance of antibiotics, antibiotic resistance genes and  
728 bacterial community composition in wastewater effluents from different Romanian hospitals',  
729 *Environ Pollut*, 225: 304-15.
- 730 Tan, C., M. Vermeulen, X. Wang, R. Zvonar, G. Garber, and N. Daneman. 2017. 'Variability in antibiotic  
731 use across Ontario acute care hospitals', *J Antimicrob Chemother*, 72: 554-63.
- 732 Taylor, G., D. Gravel, L. Saxinger, K. Bush, K. Simmonds, A. Matlow, J. Embree, N. Le Saux, L. Johnston, K.  
733 N. Suh, J. Embil, E. Henderson, M. John, V. Roth, A. Wong, and Program Canadian Nosocomial  
734 Infection Surveillance. 2015. 'Prevalence of antimicrobial use in a network of Canadian hospitals  
735 in 2002 and 2009', *Can J Infect Dis Med Microbiol*, 26: 85-9.
- 736 Tumbarello, Mario, Enrico Maria Treccarichi, Francesco Giuseppe De Rosa, Maddalena Giannella, Daniele  
737 Roberto Giacobbe, Matteo Bassetti, Angela Raffaella Losito, Michele Bartoletti, Valerio Del  
738 Bono, Silvia Corcione, Giuseppe Maiuro, Sara Tedeschi, Luigi Celani, Chiara Simona Cardellino,  
739 Teresa Spanu, Anna Marchese, Simone Ambretti, Roberto Cauda, Claudio Viscoli, Pierluigi Viale,  
740 and on behalf of ISGRI-SITA. 2015. 'Infections caused by KPC-producing *Klebsiella pneumoniae*:  
741 differences in therapy and mortality in a multicentre study', *Journal of Antimicrobial  
742 Chemotherapy*, 70: 2133-43.
- 743 Valiquette, L., C. N. Chakra, and K. B. Laupland. 2014. 'Financial impact of health care-associated  
744 infections: When money talks', *Can J Infect Dis Med Microbiol*, 25: 71-4.
- 745 Vlahović-Palčevski, V, Uga Dumpis, Piret Mitt, J Gulbinovič, Johan Struwe, G Palčevski, D Štimac, Å  
746 Lagergren, and Ulf Bergman. 2007. 'Benchmarking antimicrobial drug use at university hospitals  
747 in five European countries', *Clinical microbiology and infection*, 13: 277-83.
- 748 Wang, Huan, Meng Wang, Shen Fan, Jie Lu, Yi Lan, Menggong Li, Jiangyan Li, Rulong Liu, Jin Sun, Jiasong  
749 Fang, Pei-Yuan Qian, Yu-Zhong Zhang, and Weipeng Zhang. 2021. 'Culture Enrichment Combined  
750 With Long-Read Sequencing Facilitates Genomic Understanding of Hadal Sediment Microbes',  
751 *Frontiers in Marine Science*, 8.
- 752 Wang, W. L., S. Y. Xu, Z. G. Ren, L. Tao, J. W. Jiang, and S. S. Zheng. 2015. 'Application of metagenomics  
753 in the human gut microbiome', *World J Gastroenterol*, 21: 803-14.
- 754 Whelan, Fiona J., Barbara Waddell, Saad A. Syed, Shahrokh Shekarriz, Harvey R. Rabin, Michael D.  
755 Parkins, and Michael G. Surette. 2020. 'Culture-enriched metagenomic sequencing enables in-  
756 depth profiling of the cystic fibrosis lung microbiota', *Nature Microbiology*, 5: 379-90.
- 757 Xiao, A., F. Wu, M. Bushman, J. Zhang, M. Imakaev, P. R. Chai, C. Duvallet, N. Endo, T. B. Erickson, F.  
758 Armas, B. Arnold, H. Chen, F. Chandra, N. Ghaeli, X. Gu, W. P. Hanage, W. L. Lee, M. Matus, K. A.  
759 McElroy, K. Moniz, S. F. Rhode, J. Thompson, and E. J. Alm. 2021. 'Metrics to relate COVID-19  
760 wastewater data to clinical testing dynamics', *medRxiv*.
- 761 Yang, Ying, Xiaotao Jiang, Benli Chai, Liping Ma, Bing Li, Anni Zhang, James R. Cole, James M. Tiedje, and  
762 Tong Zhang. 2016. 'ARGs-OAP: online analysis pipeline for antibiotic resistance genes detection  
763 from metagenomic data using an integrated structured ARG-database', *Bioinformatics*, 32: 2346-  
764 51.
- 765 Zhan, Qingyu, Kristina M. Babler, Mark E. Sharkey, Ayaaz Amirali, Cynthia C. Beaver, Melinda M. Boone,  
766 Samuel Comerford, Daniel Cooper, Elena M. Cortizas, Benjamin B. Currall, Jonathan Foox,  
767 George S. Grills, Erin Kobetz, Naresh Kumar, Jennifer Laine, Walter E. Lamar, Alejandro M. A.  
768 Mantero, Christopher E. Mason, Brian D. Reding, Maria Robertson, Matthew A. Roca, Krista  
769 Ryon, Stephan C. Schürer, Bhavarth S. Shukla, Natasha Schaefer Solle, Mario Stevenson, John J.  
770 Tallon Jr, Collette Thomas, Tori Thomas, Dušica Vidović, Sion L. Williams, Xue Yin, and Helena M.  
771 Solo-Gabriele. 2022. 'Relationships between SARS-CoV-2 in Wastewater and COVID-19 Clinical

772 Cases and Hospitalizations, with and without Normalization against Indicators of Human Waste',  
773 *ACS ES&T Water*, 2: 1992-2003.

774 Zhang, Chao, Kyle Cleveland, Felice Schnoll-Sussman, Bridget McClure, Michelle Bigg, Prashant Thakkar,  
775 Nikolaus Schultz, Manish A. Shah, and Doron Betel. 2015. 'Identification of low abundance  
776 microbiome in clinical samples using whole genome sequencing', *Genome Biology*, 16: 265.

777 Zhang, Zhiguo, Guoqing Zhang, and Feng Ju. 2022. 'Using Culture-Enriched Phenotypic Metagenomics  
778 for Targeted High-Throughput Monitoring of the Clinically Important Fraction of the  $\beta$ -Lactam  
779 Resistome', *Environmental Science & Technology*, 56: 11429-39.

780 Zhao, J., P. D. Schloss, L. M. Kalikin, L. A. Carmody, B. K. Foster, J. F. Petrosino, J. D. Cavalcoli, D. R.  
781 VanDevanter, S. Murray, J. Z. Li, V. B. Young, and J. J. LiPuma. 2012. 'Decade-long bacterial  
782 community dynamics in cystic fibrosis airways', *Proc Natl Acad Sci U S A*, 109: 5809-14.

783 Zhu, Yifan, Wakana Oishi, Chikako Maruo, Mayuko Saito, Rong Chen, Masaaki Kitajima, and Daisuke  
784 Sano. 2021. 'Early warning of COVID-19 via wastewater-based epidemiology: potential and  
785 bottlenecks', *Science of The Total Environment*, 767: 145124.

786 Zimlichman, E., D. Henderson, O. Tamir, C. Franz, P. Song, C. K. Yamin, C. Keohane, C. R. Denham, and D.  
787 W. Bates. 2013. 'Health care-associated infections: a meta-analysis of costs and financial impact  
788 on the US health care system', *JAMA Intern Med*, 173: 2039-46.

789

790 **TABLES AND FIGURES**

791 **Table 1.** Changes in ARG-types after culture-enrichment of wastewater on MacConkey agar plates supplemented with selective  
 792 antibiotics relative to pelleted wastewater.

| ARG-types                      | Enrichment factor (EF) <sup>a</sup> |      |      |      |            |      |      |      |               |      |      |      |      |      |      |      |
|--------------------------------|-------------------------------------|------|------|------|------------|------|------|------|---------------|------|------|------|------|------|------|------|
|                                | Hospitals                           |      |      |      |            |      |      |      | Neighborhoods |      |      |      |      |      |      |      |
|                                | Hospital-1                          |      |      |      | Hospital-2 |      |      |      | NE1           |      |      |      | NW1  |      |      |      |
|                                | MEM                                 | CIP  | CRO  | COL  | MEM        | CIP  | CRO  | COL  | MEM           | CIP  | CRO  | COL  | MEM  | CIP  | CRO  | COL  |
| aminoglycoside                 | 1.5                                 | 2.0  | 1.8  | 2.9  | 2.8        | 2.5  | 3.2  | 3.7  | 6.8           | 8.8  | 11.0 | 3.8  | 0.9  | 6.4  | 7.1  | 3.6  |
| Aminoglycoside-aminocoumarin   | 35.8                                | 30.1 | 22.6 | 27.3 | 18.2       | 10.1 | 12.4 | 11.2 | 14.4          | 27.8 | 35.6 | 23.2 | *0.0 | 38.5 | 33.7 | 42.1 |
| Antibacterial free fatty acids | 0.0                                 | 0.0  | 0.0  | 0.0  | 0.0        | 0.0  | 0.0  | 0.0  | *0.0          | *0.0 | *0.0 | 0.0  | 0.1  | 0.1  | 0.1  | 0.0  |
| bacitracin                     | 1.4                                 | 1.4  | 1.2  | 1.3  | 1.8        | 1.5  | 1.5  | 1.6  | 3.2           | 3.0  | 3.3  | 1.5  | 1.7  | 2.4  | 2.6  | 1.4  |
| beta-lactam                    | 1.5                                 | 1.8  | 1.7  | 1.7  | 3.5        | 2.6  | 2.6  | 1.7  | 2.3           | 3.7  | 5.5  | 1.5  | 0.1  | 3.8  | 4.8  | 1.6  |
| bicyclomycin                   | FNQ                                 | 0.0  | FNQ  | 0.0  | 0.0        | 0.0  | FNQ  | 0.0  | FNQ           | 0.0  | 0.0  | FNQ  | FNQ  | 0.0  | FNQ  | FNQ  |
| diaminopyrimidine              | 5.3                                 | 6.5  | 7.8  | 2.3  | 9.4        | 6.3  | 9.8  | 0.2  | 19.8          | 7.9  | 9.6  | 2.3  | 3.2  | 15.8 | 18.7 | 3.2  |
| fluoroquinolone                | 5.2                                 | 4.5  | 4.5  | 3.2  | 5.2        | 3.4  | 4.2  | 1.6  | 8.1           | 17.8 | 21.2 | 3.8  | 0.2  | 22.9 | 19.3 | 6.5  |
| fosfomicin                     | 6.3                                 | 8.4  | 4.8  | 11.8 | 1.6        | 7.8  | 9.6  | 0.3  | 0.4           | 6.8  | 5.4  | 0.7  | 0.2  | 13.2 | 4.0  | 3.7  |
| fosmidomycin                   | 12.9                                | 11.6 | 10.0 | 11.8 | 7.0        | 5.0  | 5.6  | 3.6  | 7.4           | 13.1 | 16.4 | 13.0 | 0.8  | 14.3 | 12.6 | 17.0 |
| glycopeptide                   | 0.2                                 | 0.1  | 0.1  | 0.0  | 0.3        | *0.0 | 0.1  | *0.0 | 3.8           | *0.0 | *0.0 | 0.0  | 0.3  | 0.1  | 0.3  | *0.0 |
| MLS                            | 1.0                                 | 0.8  | 0.8  | 0.4  | 1.5        | 1.3  | 1.9  | 1.1  | 0.7           | 0.8  | 1.1  | 0.5  | 0.1  | 0.5  | 0.6  | 0.4  |
| multidrug <sup>b</sup>         | 6.4                                 | 5.8  | 4.9  | 4.3  | 5.0        | 3.0  | 3.6  | 2.0  | 6.5           | 6.2  | 8.7  | 3.2  | 2.0  | 3.9  | 5.1  | 2.5  |

|                |      |      |      |      |      |      |      |      |       |      |      |      |      |      |      |      |
|----------------|------|------|------|------|------|------|------|------|-------|------|------|------|------|------|------|------|
| mupirocin      | 0.0  | 0.0  | 0.0  | 0.0  | 0.0  | 0.0  | 0.0  | 0.0  | 0.0   | 0.0  | 0.0  | 0.0  | 0.0  | 0.0  | 0.0  | 0.0  |
| nitroimidazole | 24.7 | 22.6 | 20.2 | 24.5 | 9.4  | 6.0  | 7.1  | 7.4  | 9.0   | 13.8 | 18.1 | 15.1 | 1.5  | 21.4 | 21.0 | 25.7 |
| nucleoside     | 0.1  | 2.3  | 2.2  | 0.7  | 1.8  | 3.7  | 8.2  | 0.4  | 3.2   | 5.1  | 5.2  | 20.5 | 1.1  | 6.1  | 39.0 | 10.1 |
| oxazolidinone  | 0.0  | 0.0  | 0.0  | 0.0  | 0.0  | 0.0  | 0.0  | 0.0  | 0.9   | 0.0  | 0.0  | 0.0  | 6.6  | 0.0  | 0.0  | 0.0  |
| peptide        | 9.5  | 9.4  | 8.8  | 6.5  | 7.9  | 4.7  | 5.5  | 1.1  | 6.3   | 10.4 | 14.2 | 3.0  | 0.7  | 9.4  | 9.8  | 3.3  |
| phenicol       | 0.5  | 1.3  | 1.6  | 9.4  | 2.2  | 3.2  | 4.7  | 6.2  | 0.9   | 5.4  | 4.9  | 7.9  | 0.2  | 3.8  | 6.2  | 7.8  |
| pleuromutilin  | 0.0  | 0.0  | 0.0  | 0.0  | 0.0  | 0.0  | 0.0  | 0.0  | 0.0   | 0.0  | 0.0  | 0.0  | 0.1  | *0.0 | *0.0 | 0.0  |
| polymyxin      | 50.2 | 49.3 | 37.9 | 39.0 | 16.0 | 10.7 | 12.1 | 11.3 | 11.3  | 22.4 | 23.9 | 22.8 | 4.9  | 29.5 | 31.0 | 36.3 |
| rifamycin      | 1.0  | 2.4  | 3.6  | 0.1  | 1.3  | 4.2  | 3.7  | *0.0 | 0.1   | 0.8  | 0.4  | 0.2  | 0.1  | 0.3  | 0.7  | *0.0 |
| sulfonamide    | 1.8  | 2.8  | 2.0  | 2.5  | 2.6  | 2.2  | 2.8  | 1.6  | 12.8  | 7.8  | 9.8  | 1.3  | 1.2  | 7.4  | 14.3 | 1.3  |
| tetracycline   | 1.1  | 1.0  | 1.0  | 1.5  | 1.1  | 1.4  | 1.7  | 4.6  | 3.5   | 2.5  | 3.6  | 1.3  | 0.2  | 2.4  | 2.8  | 1.5  |
| triclosan      | 25.6 | 0.3  | 0.6  | 0.2  | 0.4  | 0.2  | 0.3  | *0.0 | 310.7 | 0.2  | 1.5  | 0.3  | 58.9 | 0.3  | 26.7 | 0.2  |
| unclassified   | 8.4  | 7.7  | 7.7  | 7.5  | 8.9  | 5.6  | 6.6  | 5.0  | 9.9   | 16.2 | 21.3 | 10.6 | 1.0  | 20.6 | 19.6 | 16.3 |

793 <sup>a</sup> Enrichment factor (EF) was calculated as the metagenomic normalized abundance ratio of a given ARG-type after culture  
794 enrichment relative to raw pellets. EF >1 (in red) indicates abundance increase, whereas EF <1 (in blue) values indicate abundance  
795 decrease. EF =0 indicates that a given ARG-type was only found in the raw wastewater pellet. Factor non quantifiable (FNQ) (orange)  
796 indicates that the ratio was not calculated because raw pellet data was 0 for a given ARG-type.

797 <sup>b</sup> Multidrug ARG-type contains genes that confer resistance to multiple antibiotic categories including macrolides, beta-lactamases,  
798 glycopeptides, quinolones, as well as other antimicrobials such as metals (Arango-Argoty et al. 2018).

799 \* EF is less than <0.05.

800 Meropenem (MEM), ciprofloxacin (CIP), colistin (COL) and ceftriaxone (CRO)



801 **FIGURES**

A.

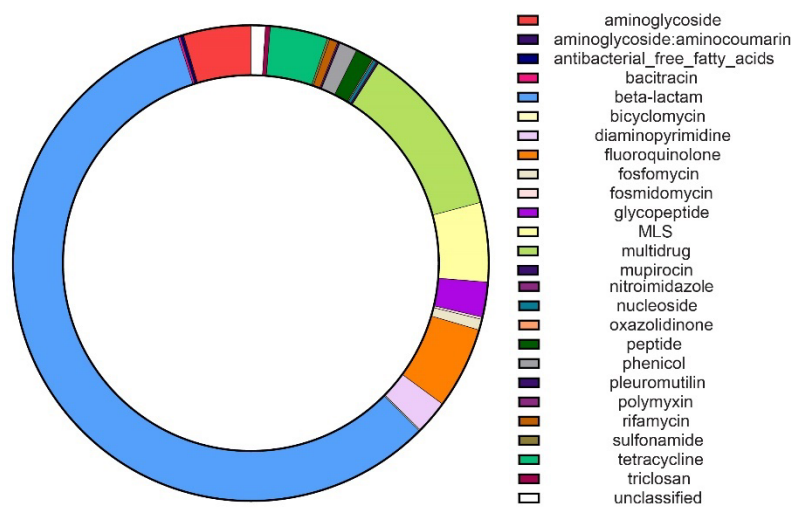

B.

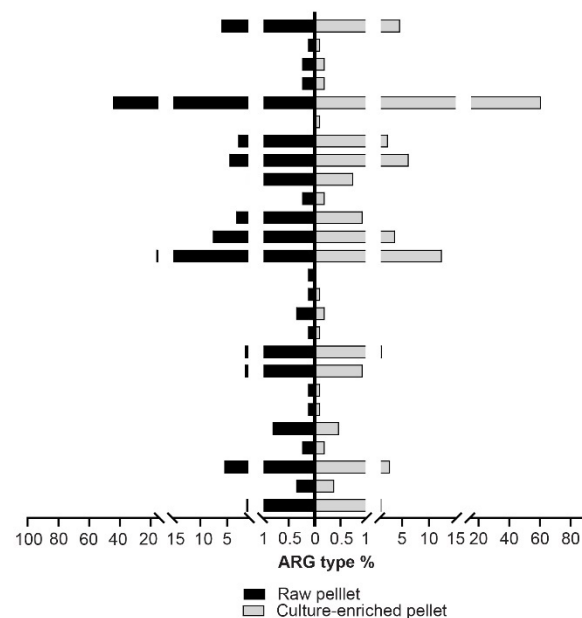

802  
 803 **Figure 1. Composition profile of ARG-types in wastewater. A.** Percentage of the resistome  
 804 for each ARG-types (mechanisms for antibiotic resistance) category found in samples before and  
 805 after culture enrichment from hospital and neighborhoods locations. **B.** ARG-type percentage  
 806 classified by the type of sample (i.e., Raw wastewater pellet and culture-enriched wastewater  
 807 pellet).

808

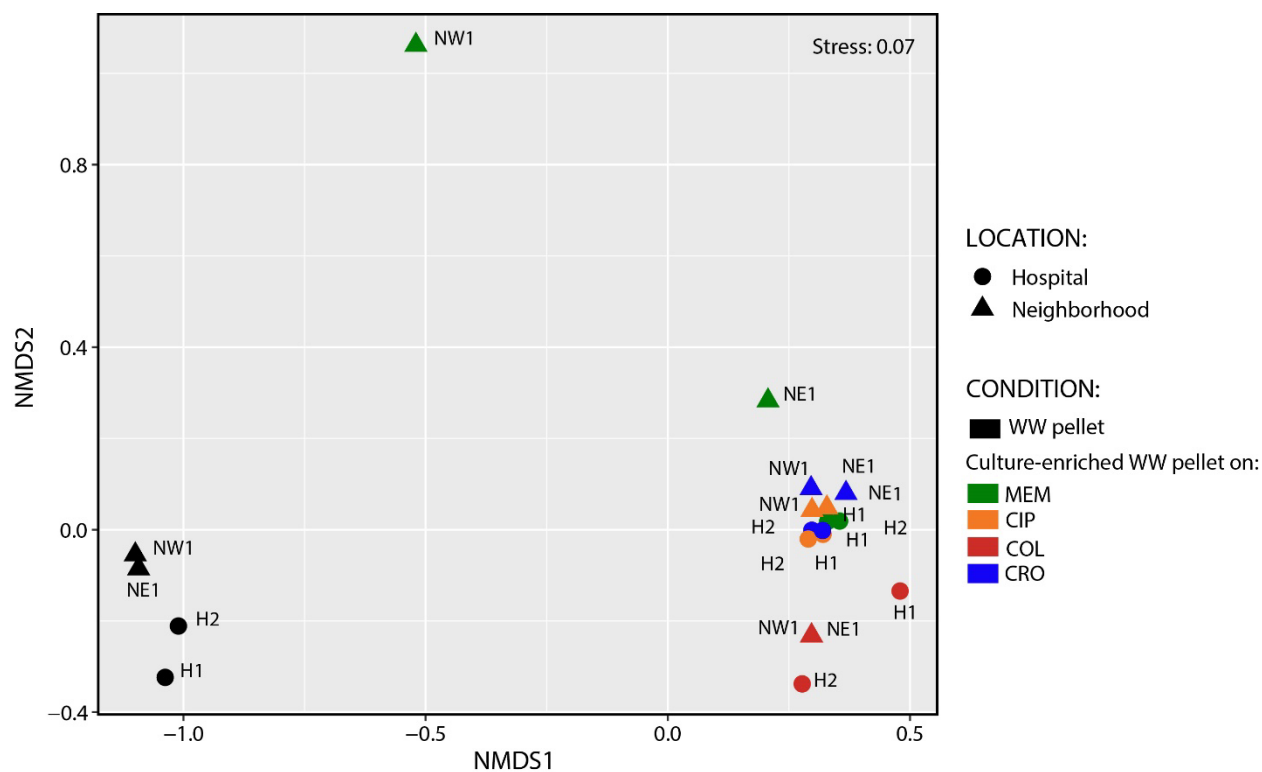

810 **Figure 2. Non-metric multidimensional scaling (NMDS) plot for the distribution of**  
811 **wastewater ARG-subtypes before and after culture enrichment.** NMDS were done on the  
812 Bray-Curtis distances of ARG profiles. Samples were shape-coded based on the location where  
813 wastewater was collected (i.e., Hospital or neighborhood); and color-coded based on condition  
814 analysed (i.e., raw pellet versus culture-enriched pellet). H1: Hospital-1, H2: Hospital-2, MEM:  
815 meropenem, CIP: ciprofloxacin, COL: colistin and CRO: ceftriaxone.

816

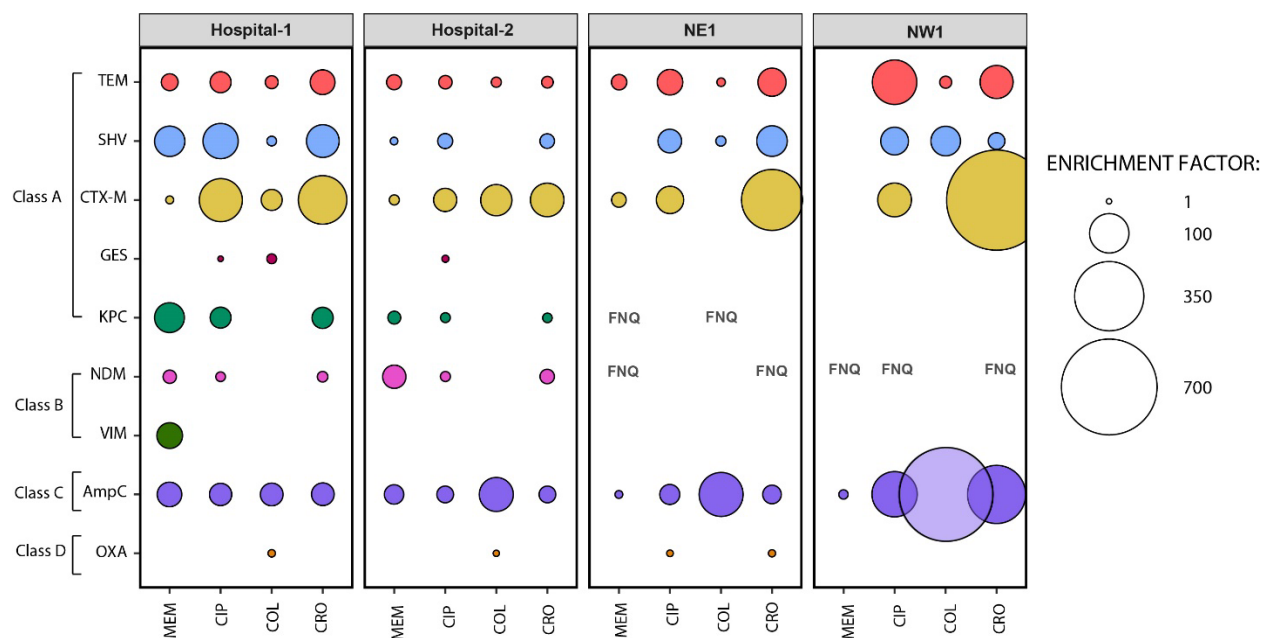

817

818 **Figure 3. Relative enrichment of  $\beta$ -lactamases found in the wastewater resistome after**

819 **selective culture-enrichment.** Enrichment factor (EF) (shown as bubbles) was calculated as the

820 metagenomic abundance ratio of a given  $\beta$ -lactamase:16S rRNA following growth on

821 MacConkey agar plates impregnated with antibiotics relative to raw wastewater pellets. Circles

822 are shown only when  $EF > 1$ . Factor non quantifiable (FNQ) indicate that the ratio was not

823 calculable because raw wastewater pellet contained 0 reads for a given  $\beta$ -lactamase. MEM:

824 meropenem, CIP: ciprofloxacin, COL: colistin and CRO: ceftriaxone.

825

826

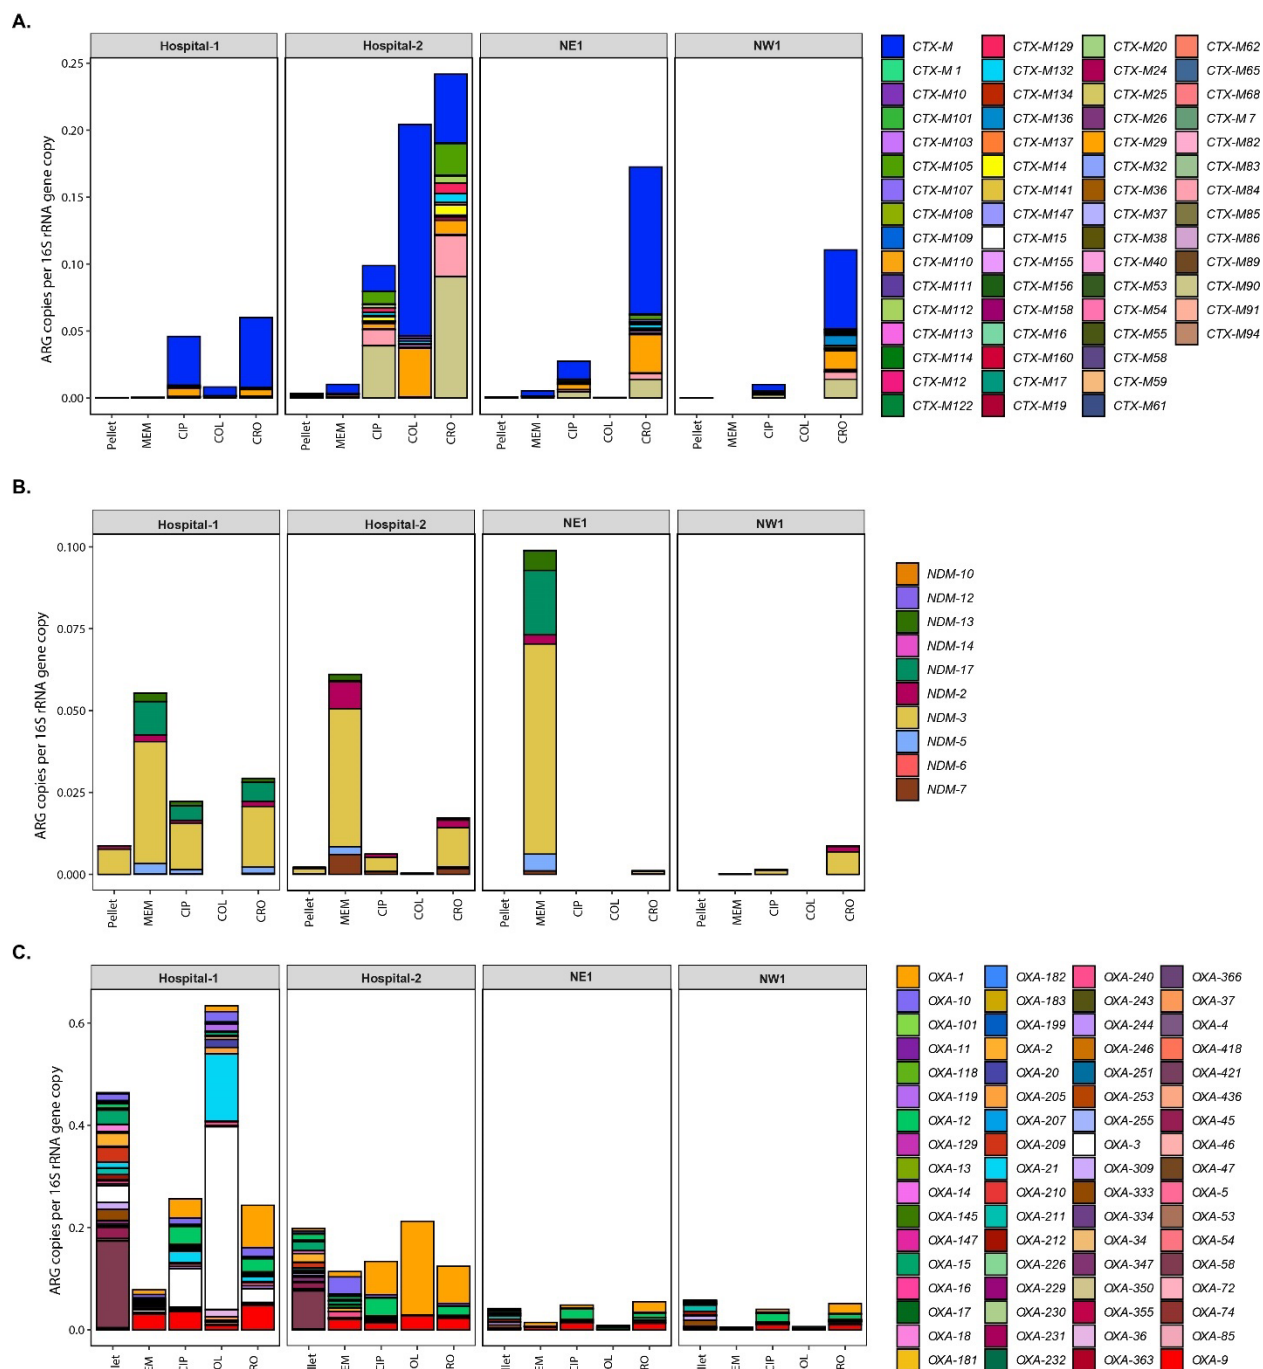

827

828 **Figure 4. Normalized abundance of clinically important  $\beta$ -lactamases found in the**  
 829 **resistome of wastewater before and after culture enrichment.** Normalized abundance is  
 830 expressed as ARG copies per 16S rRNA gene copy numbers of CTX-M (A), NDM (B) and OXA  
 831 (C) from raw wastewater pellet and culture-enriched pellet collected from hospitals (Hospital-1

832 and Hospital-2) and neighborhoods (NE1 and NW1). ARGs-subtype allelic variants are color-  
833 coded. In panel A, CTX-M allelic variants that were not classified as a specific variant during the  
834 read based annotation step were cluster and color-coded in the same group. In panel C, for ease  
835 of illustration only the 68 out of 152 variants that were found with a normalized abundance  
836  $>0.0005$  within the OXA group were plotted. MEM: meropenem, CIP: ciprofloxacin, COL:  
837 colistin and CRO: ceftriaxone.

838

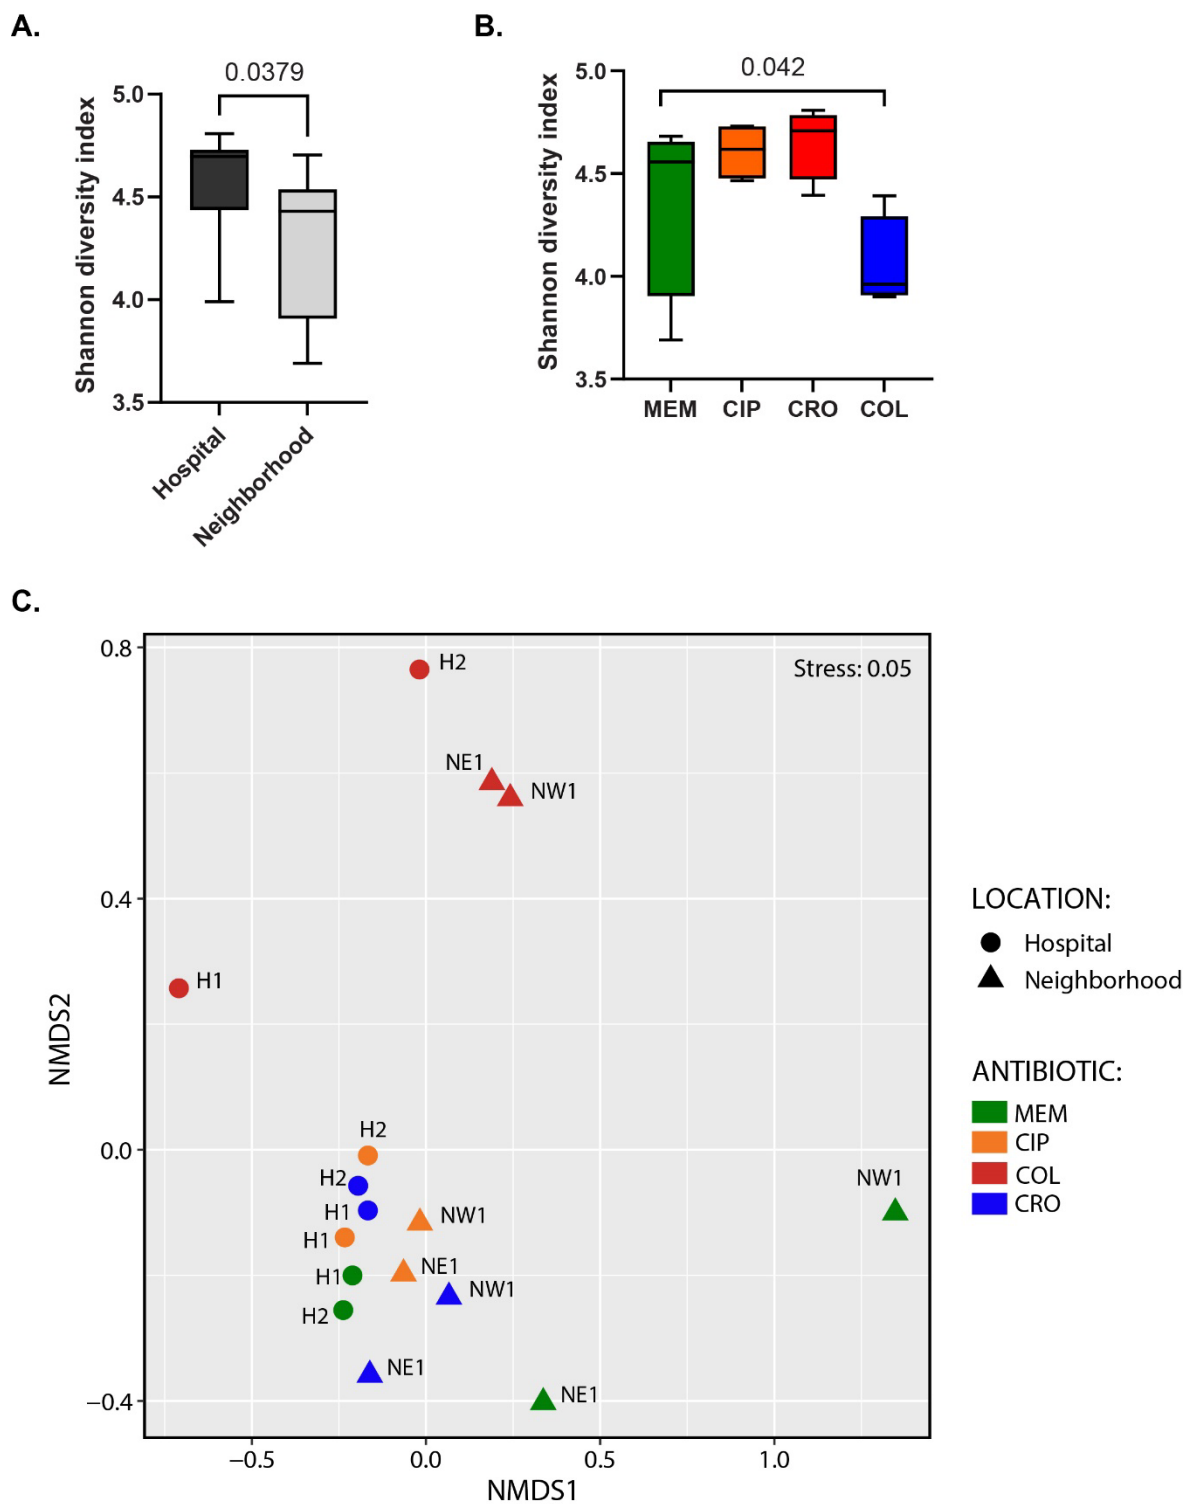

839  
840 **Figure 5. ARGs-subtype alpha and beta diversity of wastewater resistome after culture**  
841 **enrichment.** Comparison of the ARG alpha diversity measured using Shannon Diversity index

842 of the culture-enriched wastewater pellet samples based on; **(A)** sample location and **(B)**.  
843 antibiotic used for selective culture enrichment (i.e., MEM: meropenem, CIP: ciprofloxacin,  
844 COL: colistin and CRO: ceftriaxone) as determined by Mann-Whitney test and Kruskal-Wallis  
845 Test, respectively. **C.** NMDS plot was done on the Bray-Curtis distances of ARG-subtype  
846 profiles of the culture-enriched wastewater pellet samples. Samples were shape-coded based on  
847 the type of location where the sample was collected (i.e., Hospital or neighborhood); and color-  
848 coded based on the antibiotic used for selection.

849

850 **SUPPLEMENTARY TABLES**

851 **Table 1S.** Overview of the paired-end sequencing ( $2 \times 150$  bp) sequencing results obtained by

852 Illumina Novaseq 6000 PE150 platform.

| <b>Sample ID</b> | <b>Output (raw data/sample)</b> | <b>Raw reads</b> | <b>Location</b> | <b>Type</b>      |
|------------------|---------------------------------|------------------|-----------------|------------------|
| NA_1             | 10G                             | 116338888        | Hospital-1      | Pellet           |
| NA_2             | 10G                             | 118220046        | Hospital-2      | Pellet           |
| NA_3             | 6G                              | 57521818         | Hospital-1      | culture-enriched |
| NA_4             | 6G                              | 49324432         | Hospital-1      | culture-enriched |
| NA_5             | 6G                              | 57428492         | Hospital-1      | culture-enriched |
| NA_6             | 6G                              | 49060778         | Hospital-1      | culture-enriched |
| NA_7             | 6G                              | 49983644         | Hospital-2      | culture-enriched |
| NA_8             | 6G                              | 53320788         | Hospital-2      | culture-enriched |
| NA_9             | 6G                              | 59970976         | Hospital-2      | culture-enriched |
| NA_10            | 6G                              | 40860274         | Hospital-2      | culture-enriched |
| NA_11            | 10G                             | 74092986         | NE1             | Pellet           |
| NA_12            | 10G                             | 85855692         | NW1             | Pellet           |
| NA_13            | 6G                              | 57157698         | NE1             | culture-enriched |
| NA_14            | 6G                              | 51630126         | NE1             | culture-enriched |
| NA_15            | 6G                              | 55454866         | NE1             | culture-enriched |
| NA_16            | 6G                              | 39933826         | NE1             | culture-enriched |
| NA_17            | 6G                              | 77036096         | NW1             | culture-enriched |
| NA_18            | 6G                              | 45107562         | NW1             | culture-enriched |
| NA_19            | 6G                              | 53285664         | NW1             | culture-enriched |
| NA_20            | 6G                              | 47359372         | NW1             | culture-enriched |

853

854



855 **Table 2S.** qPCR assays used for ARGs and total bacterial load quantification of wastewater

856 samples.

857

| Assay                                         | Assay ID or primers/probe name | Sequence (5' – 3')                        | Reference                  |
|-----------------------------------------------|--------------------------------|-------------------------------------------|----------------------------|
| <i>bla</i> <sub>CTX-M-1</sub>                 | Ba04646149_s1                  | TaqMan Gene Expression assay              | (Thermo Fisher Scientific) |
| <i>bla</i> <sub>KPC-3</sub>                   | Ba04646152_s1                  | TaqMan Gene Expression assay              |                            |
| <i>bla</i> <sub>NDM-1</sub>                   | Ba04931076_s1                  | TaqMan Gene Expression assay              |                            |
| <i>vanA</i>                                   | Ba04646147_s1                  | TaqMan Gene Expression assay              |                            |
| <i>Clostridioides difficile</i> 16S rRNA gene | Forward primer                 | GCAAGTTGAGCGATTTACTTCGGT                  | (Kubota et al. 2014)       |
|                                               | Fluorescent probe              | FAM/TGCCTCTCAAATATATTATCCCGTATTAG/MGBBNFQ |                            |
|                                               | Reverse primer                 | GTACTGGCTCACCTTTGATATTYAAGAG              |                            |
| <i>C. difficile tcdA</i>                      | Forward primer                 | CAGTCGGATTGCAAGTAATTGACAAT                |                            |
|                                               | Fluorescent probe              | VIC/TTGAGATGATAGCAGTGTCAGGATTG/MGBBNFQ    |                            |
|                                               | Reverse primer                 | AGTAGTATCTACTACCATTAACAGTCTGC             |                            |
| 16S rRNA Total bacterial load                 | Forward primer                 | TCCTACGGGAGGCAGCAGT                       | (Nadkarni et al. 2002)     |
|                                               | Fluorescent probe              | FAM/CGTATTACCGCGGCTGCTGGCAC/MGBBNFQ       |                            |
|                                               | Reverse primer                 | GGACTACCAGGGTATCTAATCCTGTT                |                            |

858

859

860

861 **Table 3S.** Double-stranded DNA fragments (gBlocks) used as standard curve for qPCR  
 862 analysis.

| Assay                        | Sequence                                                                                                                                                                                                                                                                                                                                                                                                                                                                                                                                                                                                                                                                                                                                                                                                                                                                                                                                                                                                                                                    |
|------------------------------|-------------------------------------------------------------------------------------------------------------------------------------------------------------------------------------------------------------------------------------------------------------------------------------------------------------------------------------------------------------------------------------------------------------------------------------------------------------------------------------------------------------------------------------------------------------------------------------------------------------------------------------------------------------------------------------------------------------------------------------------------------------------------------------------------------------------------------------------------------------------------------------------------------------------------------------------------------------------------------------------------------------------------------------------------------------|
| <i>bla<sub>CTX-M-1</sub></i> | GGTACCGAGAACCTGTACTTCCAATCCAATATGGTTAAAAAATCACT<br>GCGTCAGTTCACGCTGATGGCGACGGCAACCGTCACGCTGTTGTTAG<br>GAAGTGTGCCGCTGTATGCGCAAACGGCGGACGTACAGCAAAAAT<br>TGCCGAATTAGAGCGGCAGTCGGGAGGAAGACTGGGTGTGGCATTG<br>ATTAACACAGCAGATAATTCGCAAATACTTTATCGTGTGCTGATGAGCG<br>CTTTGGCATGTGCAGCACCAGTAAAGTGATGGCCGTGGCCGCGGTGC<br>TGAAGAAAAGTGAAAGCGAACCGAATCTGTAAATCAGCGAGTTGA<br>GATCAAAAAATCTGACTTGGTTAACTATAATCCGATTGCGGAAAAGC<br>ACGTCGATGGGACGATGTCACTGGCTGAGCTTAGCGCGGCCGCGCTA<br>CAGTACAGCGATAACGTGGCGATGAATAAGCTGATTTCTCACGTTGG<br>CGGCCCGGCTAGCGTCACCGCGTTCGCCCCGACAGCTGGGAGACGAA<br>ACGTTCCGTCTCGACCGTACCGAGCCGACGTTAAACACCGCCATTCC<br>GGGCGATCCGCGTGATAACACTTCACCTCGGGCAATGGCGCAAACCTC<br>TGCGTAATCTGACGCTGGGTAAAGCATTGGGTGACAGCCAACGGGC<br>GCAGCTGGTGACATGGATGAAAGGCAATACCACCGGTGCAGCGAGC<br>ATTCAGGCTGGACTGCCTGCTTCCTGGGTTGTGGGGGATAAAACCGG<br>CAGCGGTGACTATGGCACCACCAACGATATCGCGGTGATCTGGCCA<br>AAAGATCGTGCGCCGCTGATTCTGGTCACTTACTTCACCCAGCCTCA<br>ACCTAAGGCAGAAAGCCGTCGCGATGTATTAGCGTCGGCGGGCTAAA<br>ATCGTCACCAACGGTTTGTAAATTGGAAGTGGATAACGGATCCGAAT<br>TCGA |
| <i>bla<sub>KPC-3</sub></i>   | GGTACCGAGAACCTGTACTTCCAATCCAATATGTCACTGTATCGCCG<br>TCTAGTTCTGCTGTCTTGTCTCTCATGGCCGCTGGCTGGCTTTTCTGC<br>CACCGCGCTGACCAACCTCGTCGCGGAACCATTCGCTAAACTCGAAC<br>AGGACTTTGGCGGCTCCATCGGTGTGTACGCGATGGATAACGGCTCA<br>GCGCAACTGTAAGTTACCGCGCTGAGGAGCGCTTCCACTGTGCAG<br>CTCATTCAAGGGCTTTCTTGCTGCCGCTGTGCTGGCTCGCAGCCAGC<br>AGCAGGCCGGCTTGCTGGACACACCCATCCGTTACGGCAAAAATGC<br>GCTGGTTCCGTGGTCACCCATCTCGGAAAAATATCTGACAACAGGCA<br>TGACGGTGGCGGAGCTGTCCGCGGCCCGCGTGAATACAGTGATAA<br>CGCCGCCGCAATTTGTTGCTGAAGGAGTTGGGCGGCCCGGCCGGGG<br>TGACGGCCTTCATGCGCTCTATCGGCGATAACACGTTCCGTCTGGAC<br>CGCTGGGAGCTGGAGCTGAACTCCGCCATCCAGGCGATGCGCGCG<br>ATACCTCATCGCCGCGCGCCGTGACGGAAAGCTTACAAAACTGAC<br>ACTGGGCTCTGCACTGGCTGCGCCGACGCGGCAGCAGTTTGTGATT<br>GGCTAAAGGGAAACACGACCGGCAACCACCGCATCCGCGCGGGCGGT<br>GCCGGCAGACTGGGCAGTCGGAGACAAAACCGGAACCTGCGGAGTG<br>TATGGCACGGCAAATGACTATGCCGTCGTCTGGCCCCTGGGCGCGC<br>ACCTATTGTGTTGGCCGTCTACACCGGGCGCCTAACAAGGATGACA<br>AGTACAGCGAGGCCGTCATCGCCGCTGCGGCTAGACTCGCGCTCGA                                                                     |

---

GGGATTGGGCGTCAACGGGCAGTAAGGCTCTGAAAATCATCTATTG  
GCCACCACCGCCGCCCTTGCGGGCGGCATGGATTACCAACCACTGT  
CACATTTAGGATTGGAAGTGGATAACGGATCCGAATTCGA

---

*bla<sub>NDM-1</sub>*  
GGTACCGAGAACCTGTACTTCCAATCCAATATGGAATTGCCAATAT  
TATGCACCCGGTTCGCGAAGCTGAGCACCGCATTAGCCGCTGCATTGA  
TGCTGAGCGGGTGCATGCCCAGTAAATCCGCCCGACGATTGGCCA  
GCAAATGGAACTGGCGACCAACGGTTTGGCGATCTGGTTTTCCGCC  
AGCTCGCACCGAATGTCTGGCAGCACACTTCCTATCTCGACATGCCG  
GGTTTTCGGGGCAGTCGCTTCCAACGGTTTGATCGTCAGGGATGGCGG  
CCGCGTGTGGTGGTCGATACCGCCTGGACCAATGACCAGACCGCCC  
AGATCCTCAACTGGATCAAGCAGGAGATCAACCTGCCGGTTCGCGCT  
GGCGGTGGTGACTCACGCGCATCAGGACAAGATGGGCGGTATGGAC  
GCGCTGCATGCGGCGGGGATTGCGACTTATGCCAATGCGTTGTGCGAA  
CCAGCTTGCCCCGCAAGAGGGGATGGTTGCGGCGCAACACAGCCTG  
ACTTTCGCCGCCAATGGCTGGGTTCGAACCAGCAACCGCGCCCAACTT  
TGGCCCCTCAAGGTATTTTACCCCGGCCCGCCACACCAGTGACA  
ATATCACCGTTGGGATCGACGGCACCGACATCGCTTTTGGTGGCTGC  
CTGATCAAGGACAGCAAGGCCAAGTCGCTCGGCAATCTCGGTGATG  
CCGACACTGAGCACTACGCCGCGTCAGTGCGCGCGTTTGGTGGCGG  
TTCCCAAGGCCAGCATGATCGTGATGAGCCATTCCGCCCCCGATAG  
CCGCGCCGCAATCACTCATAACGGCCCGCATGGCCGACAAGCTGCGCT  
GAATTGGAAGTGGATAACGGATCCGAATTCGA

---

*vanA*  
GGTACCGAGAACCTGTACTTCCAATCCAATATGAATAGAATAAAAGT  
TGCAATACTGTTTGGGGGTTGCTCAGAGGAGCATGACGTATCGGTAA  
AATCTGCAATAGAGATAGCCGCTAACATTAATAAAGAAAAATACGA  
GCCGTTATACATTGGAATTACGAAATCTGGTGTATGGAAAATGTGCG  
AAAAACCTTGCGCGGAATGGGAAAACGACAATTGCTATTCAGCTGT  
ACTCTCGCCGGATAAAAAAATGCACGGATTACTTGTTAAAAAGAAC  
CATGAATATGAAATCAACCATGTTGATGTAGCATTTTCAGCTTTGCA  
TGGCAAGTCAGGTGAAGATGGATCCATACAAGGTCTGTTTGAATTGT  
CCGGTATCCCTTTTGTAGGCTGCGATATTCAAAGCTCAGCAATTTGT  
ATGGACAAATCGTTGACATACATCGTTGCGAAAAATGCTGGGATAG  
CTACTCCCGCCTTTTGGGTTATTAATAAAGATGATAGGCCGGTGGCA  
GCTACGTTTACCTATCCTGTTTTTTGTTAAGCCGGCGCGTTCAGGCTCA  
TCCTTCGGTGTGAAAAAAGTCAATAGCGCGGACGAATTGGACTACG  
CAATTGAATCGGCAAGACAATATGACAGCAAAATCTTAATTGAGCA  
GGCTGTTTCGGGCTGTGAGGTCGGTGTGCGGTATTGGGAAACAGTG  
CCGCGTTAGTTGTTGGCGAGGTGGACCAAATCAGGCTGCAGTACGG  
AATCTTTCGTATTCATCAGGAAGTCGAGCCGGAAAAAGGCTCTGAAA  
ACGCAGTTATAACCGTTCCCGCAGACCTTTCAGCAGAGGAGCGAGG  
ACGGATACAGGAAACGGCAAAAAAATATATAAAGCGCTCGGCTGT  
AGAGGTCTAGCCCGTGTGGATATGTTTTTACAAGATAACGGCCGCAT  
TGTAACGAAGTCAATACTCTGCCCGGTTTCACGTCATACAGTC  
GTTATCCCGTATGATGGCCGCTGCAGGTATTGCACTTCCCGAACTG  
ATTGACCGCTTGATCGTATTAGCGTTAAAGGGGTGAATTGGAAGTGG  
ATAACGGATCCGAATTCGA

---

---

|                                         |                                                                                                                                                                                                                                                                                                                                                                                                                                                                                                                                                                                                                                  |
|-----------------------------------------|----------------------------------------------------------------------------------------------------------------------------------------------------------------------------------------------------------------------------------------------------------------------------------------------------------------------------------------------------------------------------------------------------------------------------------------------------------------------------------------------------------------------------------------------------------------------------------------------------------------------------------|
| <i>C. difficile</i><br>16S rRNA<br>gene | GGTACCGAGAACCTGTACTTCCAATCCAATGAGTTTGATCCTGGCTC<br>AGGATGAACGCTGGCGGCGTGCCTAACACATGCAAGTTGAGCGATT<br>TACTTCGGTAAAGAGCGGCGGACGGGTGAGTAACGCGTGGGTAACC<br>TACCCTGTACACACGGATAACATACCGAAAGGTATGCTAATACGGG<br>ATAATATATTTGAGAGGCATCTCTTGAATATCAAAGGTGAGCCAGTA<br>CAGGATGGACCCGCGTCTGATTAGCTAGTTGGTAAGGTAACGGCTTA<br>CCAAATCACTATCAAAATAAAAGTGTTTACCATCAATAGTTTTATAA<br><i>C. difficile</i><br><i>tcdA</i><br>CCATTAAAGGCAATAGCGGTATCAGTATCAAAGTAGTATCTACTACC<br>ATTAACAGTCTGCCAACCTTTTGAGATGATAGCAGTGTGTCAGGATTGA<br>AATAATACTTATTATTGTCAATTACTTGCAATCCGACTGCAGCAATA<br>GCATTATTAGGATTAAGTAATATTTTCATTGGAAGTGGATAACGGAT<br>CCGAATTCGA |
|-----------------------------------------|----------------------------------------------------------------------------------------------------------------------------------------------------------------------------------------------------------------------------------------------------------------------------------------------------------------------------------------------------------------------------------------------------------------------------------------------------------------------------------------------------------------------------------------------------------------------------------------------------------------------------------|

---

863

864

865 **Table 4S.** Number of 16S rRNA normalized aligned reads to each antimicrobial resistance gene

866 at ARG-subtype level.

867 Attached excel file.

868

869 **SUPPLEMENTARY FIGURES**

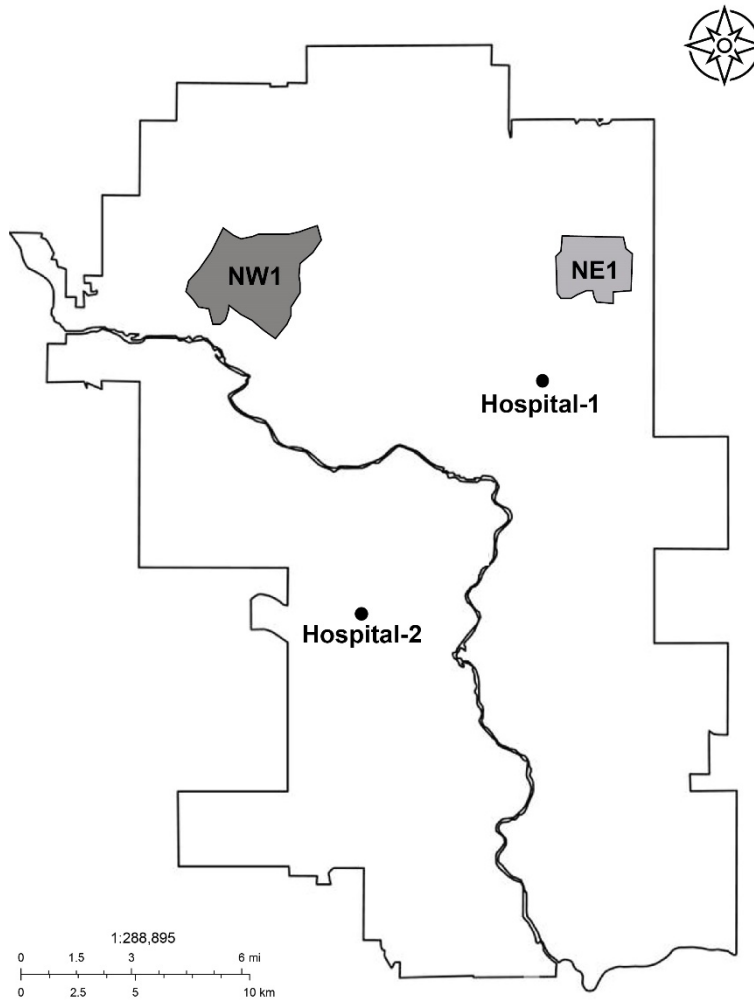

870

871 **Figure 1S. Map of Calgary showing the two hospitals and the two targeted neighborhoods**  
872 **included in the study.** Hospital locations are indicated as dots and neighborhoods' catchment  
873 area are shown by the smaller shaded regions and are designated by quadrant: NE1 and NW1.

874

A.

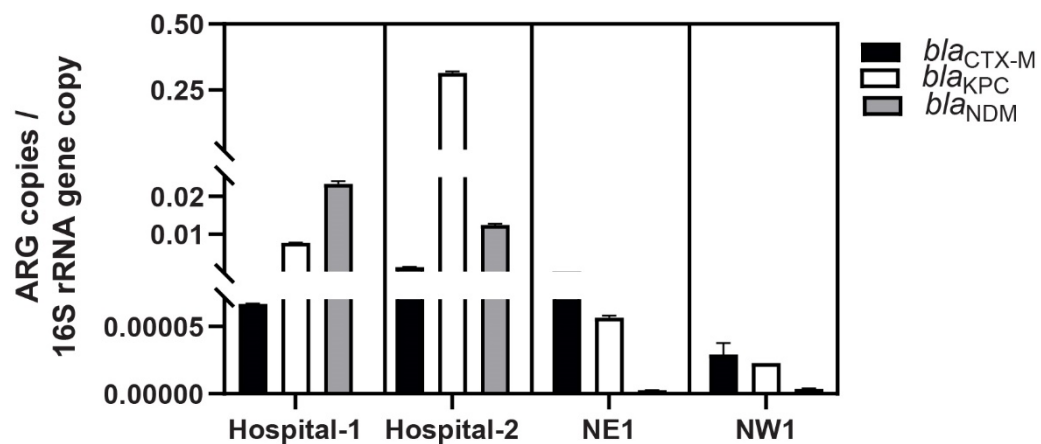

B.

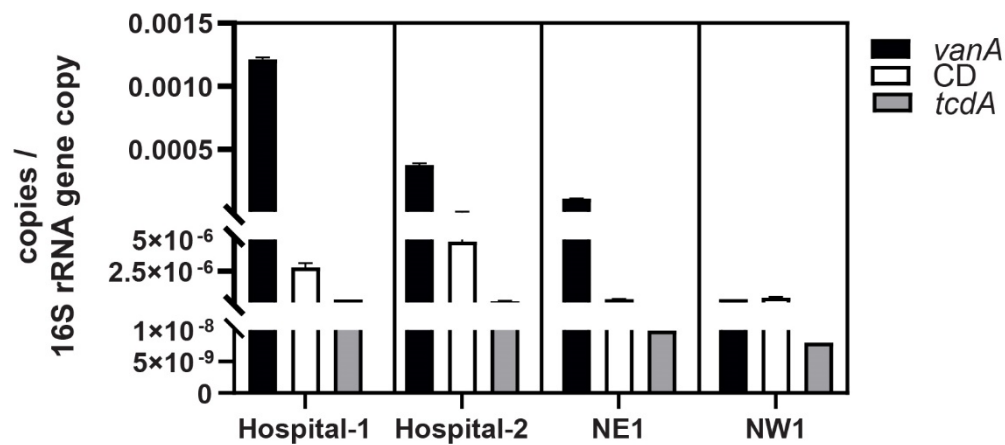

C.

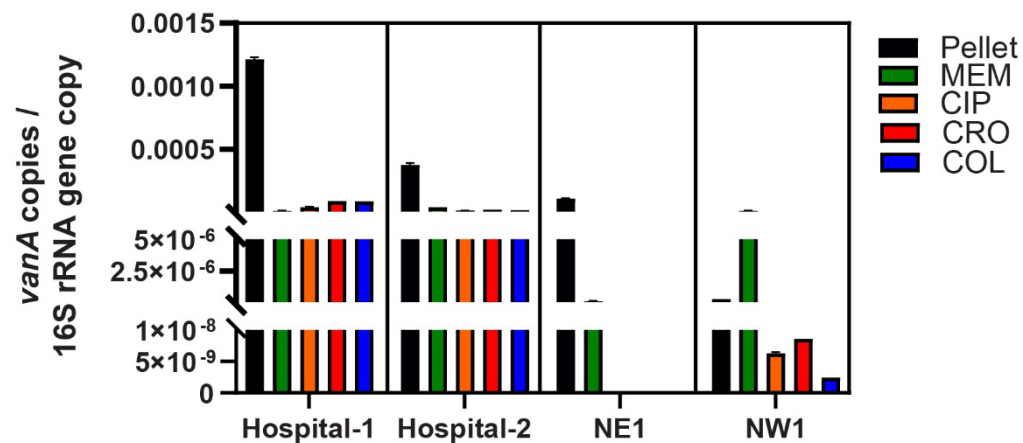

876 **Figure 2S. Antibiotic resistance gene determinants. A.** Absolute quantification of targeted  $\beta$ -  
877 lactamases normalized by the total bacterial load in raw wastewater pellet samples collected  
878 from hospitals (Hospital-1 and Hospital-2) and neighborhoods (NE1 and NW1) locations. **B.**  
879 Total burden of targeted antimicrobial resistant organisms (AROs)-related gene determinants  
880 (i.e., Vancomycin-resistant Enterococcus (VRE): *vanA* and *Clostridioides difficile* (CD))  
881 normalized by the total bacterial load in raw wastewater pellet samples. **C.** Absolute  
882 quantification of *vanA* normalized by the total bacterial load in raw wastewater pellet and  
883 culture-enriched pellet samples (i.e., MEM: meropenem, CIP: ciprofloxacin, COL: colistin and  
884 CRO: ceftriaxone).

885

886

## 887 REFERENCES

- 888 Arango-Argoty, Gustavo, Emily Garner, Amy Pruden, Lenwood S. Heath, Peter Vikesland, and Liqing  
889 Zhang. 2018. 'DeepARG: a deep learning approach for predicting antibiotic resistance genes  
890 from metagenomic data', *Microbiome*, 6: 23.
- 891 Kubota, Hiroyuki, Takafumi Sakai, Agata Gawad, Hiroshi Makino, Takuya Akiyama, Eiji Ishikawa, and  
892 Kenji Oishi. 2014. 'Development of TaqMan-Based Quantitative PCR for Sensitive and Selective  
893 Detection of Toxigenic *Clostridium difficile* in Human Stools', *PLOS ONE*, 9: e111684.
- 894 Nadkarni, Mangala A, F. Elizabeth Martin, Nicholas A Jacques, and Neil Hunter. 2002. 'Determination of  
895 bacterial load by real-time PCR using a broad-range (universal) probe and primers set',  
896 *Microbiology*, 148: 257-66.

897
